# Supplementary material for: Prevalence of mental health conditions, sensory impairments and physical disability in people with co-occurring intellectual disabilities and autism compared with other people: a cross-sectional total population study in Scotland
Source: PubMed Central journal article supplement (PMC7204861; doi:10.1136/bmjopen-2019-035280), 2020-04-26
Supplement: bmjopen-2019-035280.draft_revisions.pdf [file bmjopen-2019-035280.draft_revisions.pdf]

# BMJ Open

BMJ Open is committed to open peer review. As part of this commitment we make the peer review history of every article we publish publicly available.

When an article is published we post the peer reviewers' comments and the authors' responses online. We also post the versions of the paper that were used during peer review. These are the versions that the peer review comments apply to.

The versions of the paper that follow are the versions that were submitted during the peer review process. They are not the versions of record or the final published versions. They should not be cited or distributed as the published version of this manuscript.

BMJ Open is an open access journal and the full, final, typeset and author-corrected version of record of the manuscript is available on our site with no access controls, subscription charges or pay-per-view fees (<http://bmjopen.bmj.com>).

If you have any questions on BMJ Open's open peer review process please email [info.bmjopen@bmj.com](mailto:info.bmjopen@bmj.com)

# BMJ Open

**The prevalence of mental health conditions, sensory impairments, and physical disability in people with co-occurring intellectual disabilities and autism (both conditions together) compared with other people – a total population study of 5,295,403 people**

|                               |                                                                                                                                                                                                                        |
|-------------------------------|------------------------------------------------------------------------------------------------------------------------------------------------------------------------------------------------------------------------|
| Journal:                      | <i>BMJ Open</i>                                                                                                                                                                                                        |
| Manuscript ID                 | bmjopen-2019-035280                                                                                                                                                                                                    |
| Article Type:                 | Original research                                                                                                                                                                                                      |
| Date Submitted by the Author: | 28-Oct-2019                                                                                                                                                                                                            |
| Complete List of Authors:     | Dunn, Kirsty; University of Glasgow, Health and Wellbeing<br>Rydzewska, Ewelina; University of Glasgow, Institute of Health and Wellbeing<br>Cooper, Sally-Ann; Glasgow University , Institute of Health and Wellbeing |
| Keywords:                     | MENTAL HEALTH, Adult psychiatry < PSYCHIATRY, PUBLIC HEALTH                                                                                                                                                            |
|                               |                                                                                                                                                                                                                        |

SCHOLARONE™  
Manuscripts

1  
2  
3 The prevalence of mental health conditions, sensory impairments,  
4 and physical disability in people with co-occurring intellectual  
5 disabilities and autism (both conditions together) compared with  
6 other people – a total population study of 5,295,403 people  
7  
8  
9  
10  
11  
12  
13  
14

15 Kirsty Dunn\*

16 Ewelina Rydzewska (University of Glasgow, Glasgow, UK)

17 Sally-Ann Cooper (University of Glasgow, Glasgow, UK)

18  
19  
20  
21  
22  
23  
24  
25  
26 \*Corresponding author

27 Kirsty Dunn

28 [Kirsty.wright@glasgow.ac.uk](mailto:Kirsty.wright@glasgow.ac.uk)

29 07975867751

30 Institute of Health and Wellbeing

31 University of Glasgow

32 Glasgow

33 UK  
34  
35  
36  
37  
38  
39  
40  
41  
42  
43  
44  
45  
46  
47  
48  
49  
50  
51  
52  
53  
54  
55  
56  
57  
58  
59  
60

**Word count:** 3,210

**Keywords:** Intellectual disabilities, autism, mental health conditions, sensory impairments, physical disability.

## Abstract (281 words)

**Objectives:** To investigate prevalence of mental health conditions, sensory impairments, and physical disability in children, adults, and older adults with co-occurring intellectual disabilities and autism, given its frequent co-occurrence, compared with the general population.

**Design:** Whole country cohort study.

**Setting:** General community.

**Participants:** 5,709 people with co-occurring intellectual disabilities and autism, compared with 5,289,694 other people.

**Outcome measures:** Rates and odds ratios (OR) with 95% confidence intervals (95% CI) for mental health conditions, visual impairment, hearing impairment and physical disability in people with co-occurring intellectual disabilities and autism compared with other people, adjusted for age, sex, and interaction between age and co-occurring intellectual disabilities and autism.

**Results:** All four long-term conditions were markedly more common in children, adults, and older adults with co-occurring intellectual disabilities and autism compared with other people. For mental health, OR=130.8 (95% CI 117.1, 146.1); visual impairment OR=65.9 (95% CI 58.7, 73.9); hearing impairment OR=22.0 (95% CI 19.2, 25.2); physical disability OR=157.5 (95% CI 144.6, 171.7). These ratios are also greater than previously reported for people with *either* intellectual disabilities *or* autism rather than co-occurring intellectual disabilities and autism.

**Conclusions:** We have quantified the more than double disadvantage for people with co-occurring intellectual disabilities and autism, in terms of additional long-term health conditions. This may well impact on quality of life. It raises challenges for staff working with these people in view of additional

1  
2  
3 complexity in assessments, diagnoses, and interventions of additional health  
4 conditions, as sensory impairments and mental health conditions in particular,  
5 compound with the persons pre-existing communication and cognitive  
6 problems in this context. Planning is important, with staff being trained,  
7 equipped, resourced and prepared to address the challenge of working for  
8 people with these conditions.  
9  
10  
11  
12  
13  
14  
15  
16  
17  
18  
19

## 20 **Strengths and limitations of this study**

- 21 • Large scale, whole country study, with a high response rate (94%), so the  
22 results are representative of the whole population.
- 23 • Intellectual disabilities, autism, and additional long-term conditions were  
24 enquired about systematically for everyone in the population.
- 25 • The wording of questions was tested in advance, via cognitive question  
26 testing during the design of Scotland's Census, 2011.
- 27 • Limitations include proxy-reporting.
- 28 • People known to have autism/Asperger's syndrome, intellectual disabilities,  
29 and the four long-term conditions were reported, rather than each  
30 undergoing detailed individual research assessments which are not possible  
31 in such large population studies.  
32  
33  
34  
35  
36  
37  
38  
39  
40  
41  
42  
43  
44  
45  
46  
47  
48  
49  
50  
51  
52  
53  
54  
55  
56  
57  
58  
59  
60

## Background

People with intellectual disabilities<sup>1-4</sup> and people with autism<sup>5-7</sup> have more mental and physical health needs than other people. A whole population study of Scotland reported that 21.7% of people with intellectual disabilities also had autism, and 18.0% of people with autism also had intellectual disabilities,<sup>8</sup> so this dually diagnosed group warrant investigation. One would suspect that this population with co-occurring intellectual disabilities and autism is likely to have a high level of additional health needs, but this has received little previous attention. A higher number of additional health needs increases the likelihood of misdiagnosis, and treatment interactions, so requires more complex treatment plans. Hence it is important to investigate long-term additional health needs experienced by people with co-occurring intellectual disabilities and autism.

Some studies have investigated mental ill-health in people with co-occurring intellectual disabilities and autism. A small study of 149 adults with severe or profound intellectual disabilities and autism, living in state-run developmental centres in Louisiana, USA, compared comorbidity with 158 adults with intellectual disabilities without autism in the same centres. The former group had more symptomology for anxiety, mania, schizophrenia, stereotypies, self-injurious behaviour, eating disorders, sexual disorders, and impulse control.<sup>9</sup> A study in Norway compared 62 adults with co-occurring autism and intellectual disabilities under the care of autism services, with 132 adults with intellectual disabilities only receiving intellectual disabilities support.<sup>10</sup> High levels of psychiatric disorders were reported in both groups; 53.2% in the co-occurring intellectual disabilities and autism group, and 17.4% in the intellectual

1  
2  
3 disabilities only group. An English study of referrals to a specialist intellectual  
4 disabilities psychiatric service described 42% of the 137 referred adults who  
5 had autism as well as intellectual disabilities to have comorbid  
6  
7  
8 psychopathology, most commonly schizophrenia.<sup>11</sup> A study of youth aged 14-  
9  
10  
11 20 years age, gender matched 36 people with co-occurring intellectual  
12  
13  
14 disabilities and autism with 36 people with intellectual disabilities without  
15  
16  
17 autism.<sup>12</sup> They reported the former group to have more episodes of mental ill-  
18  
19  
20 health, most commonly depression. A study of people aged 8-29 years with  
21  
22  
23 intellectual disabilities and challenging behaviour living in four residential units  
24  
25  
26 in England included 69 who also had autism and 13 who did not.<sup>13</sup> They  
27  
28  
29 reported a higher prevalence of organic disorders, anxiety and stereotypies in  
30  
31  
32 the young people with co-occurring intellectual disabilities and autism. This  
33  
34  
35 literature is difficult to summarise overall, as, as well as having small sample  
36  
37  
38 sizes, the participants were not drawn from representative populations.  
39  
40  
41

42  
43  
44 A further study had the advantage of being population-based, but was still  
45  
46  
47 small in size.<sup>14</sup> It compared the prevalence, and incidence, of mental ill-health  
48  
49  
50 in 77 adults with co-occurring intellectual disabilities and autism with 946  
51  
52  
53 adults with intellectual disabilities without autism, and also with 154  
54  
55  
56 individually age, gender, ability-level, and Down syndrome matched controls.  
57  
58  
59 The adults with autism had a higher point prevalence of problem behaviours  
60  
61  
62 than the 946 without autism, but compared with the 154 matched controls  
63  
64  
65 there was no difference in prevalence, or incidence of either problem  
66  
67  
68 behaviours or other mental ill-health.<sup>14</sup> Three large whole population studies  
69  
70  
71 have reported that of people with intellectual disabilities, 21.7% reported  
72  
73  
74 mental health conditions;<sup>3</sup> and of people with autism, 33.0% of adults,<sup>6</sup> and  
75  
76  
77

1  
2  
3 7.6% of children<sup>7</sup> reported mental health conditions, but did not report the  
4 rates for people with co-occurring intellectual disabilities and autism.  
5  
6  
7

8  
9  
10 With regards to sensory impairments, of the 36 matched youth with  
11 intellectual disabilities with and without autism, 38.9% with autism reported  
12 having visual problems compared with 50.0% without autism, and 13.9% with  
13 autism reported having hearing problems compared with 19.4% without  
14 autism.<sup>12</sup> An intellectual disabilities register study reported that 95 of the 368  
15 (25.8%) adults with intellectual disabilities who had visual impairment also had  
16 markers for autism, compared with 422 of 2,674 (16%) of those who had  
17 normal vision, and that 46 of the 60 (76.7%) of the adults with intellectual  
18 disabilities and congenital blindness also had markers for autism, compared  
19 with only 36 of the 67 (53.7%) with normal vision.<sup>15</sup>  
20  
21  
22  
23  
24  
25  
26  
27  
28  
29  
30  
31

32  
33 We have not identified other papers on sensory impairments or any on  
34 physical disabilities in people with co-occurring intellectual disabilities and  
35 autism. However, previous large whole population studies have reported that  
36 of people with intellectual disabilities, 12.4% reported blindness/sight loss,  
37 13.1% reported deafness/hearing loss, and 32.6% reported physical disability.<sup>3</sup>  
38 Of people with autism, 12.1% of adults<sup>6</sup> and 3.5% of children reported  
39 blindness/sight loss,<sup>7</sup> 14.1% of adults<sup>6</sup> and 2.9% of children reported  
40 deafness/hearing loss,<sup>7</sup> and 24.0% of adults<sup>6</sup> and 10.7% of children reported  
41 physical disability.<sup>7</sup> They did not, however, report the rates of these conditions  
42 for people with co-occurring intellectual disabilities and autism.  
43  
44  
45  
46  
47  
48  
49  
50  
51  
52  
53  
54

55  
56 Given the frequent overlap of intellectual disabilities and autism, information  
57 on the associated comorbid conditions is important, to assist policy makers,  
58  
59  
60



1  
2  
3 planners, and practitioners to best adapt services for individuals with co-  
4 occurring intellectual disabilities and autism. This paper aims to investigate the  
5 prevalence of mental health conditions, sensory impairments, and physical  
6 disability in children, adults, and older adults with co-occurring intellectual  
7 disabilities and autism, compared with other people.  
8  
9  
10  
11  
12  
13  
14  
15

## 16 **Methods**

### 17 **Approval**

18 Approval was obtained from the Scottish Government to undertake secondary  
19 data analysis of Scotland's Census, 2011.  
20  
21  
22

### 23 **Data Source**

24 Scotland's Census provides information on Scotland's population every ten  
25 years, with the most recent Census on 27<sup>th</sup> March 2011.<sup>16</sup> The Census provides  
26 information on the number and characteristics of Scotland's population and  
27 households on the Census date.  
28  
29  
30

31 It is a legal requirement to complete the census form and households were  
32 informed that failure to make a Census return, or supplying false information  
33 could result in a £1,000 fine. A very high response rate was achieved, with an  
34 estimated 94% of all of Scotland's population completing the Census. The  
35 Census team used a Census Coverage Survey with about 40,000 households, to  
36 estimate numbers and characteristics of the missing 6%.<sup>17</sup> The Coverage Survey  
37 and Census records were deterministically matched to check for duplicates.  
38 Individuals estimated to have been missed were then imputed using a subset  
39 of characteristics from real individuals. The edit and imputation methodology  
40  
41  
42  
43  
44  
45  
46  
47  
48  
49  
50  
51  
52  
53  
54  
55  
56  
57  
58  
59  
60

1  
2  
3 was adapted from the Office for National Statistics rigorous and systematic  
4  
5 guidelines.<sup>17</sup>  
6  
7  
8

9  
10 The Census was completed by the head of each household on behalf of all  
11 occupants of the household. We consider it unlikely that people with co-  
12 occurring intellectual disabilities and autism completed the form, given the  
13 reading age required to do so. Rather, we expect that the people who  
14 completed the form on their behalf were parent-carers in family households,  
15 support workers for people living in supported accommodation, and the  
16 managers/key workers at communal establishments.  
17  
18  
19  
20  
21  
22  
23  
24  
25

## 26 **Variables**

27  
28 The census included a question to identify people with intellectual disabilities  
29 and autism, as well as mental health conditions, sensory impairments, and  
30 physical disabilities: 'Do you have any of the following conditions which have  
31 lasted, or are expected to last, at least 12 months? Tick all that apply'. There  
32 was a choice of ten possible responses to this question: deafness or partial  
33 hearing loss; blindness or partial sight loss; learning disability (for example,  
34 Down's syndrome); learning difficulty (for example, dyslexia); developmental  
35 disorder (for example, Autistic Spectrum Disorder or Asperger's Syndrome);  
36 physical disability; mental health condition; long-term illness, disease or  
37 condition; other condition. For "other condition" the option of providing more  
38 detail in an open text response was provided.  
39  
40  
41  
42  
43  
44  
45  
46  
47  
48  
49  
50  
51  
52  
53

54 In Scotland, the term "learning disability" is used synonymously with that of  
55 "intellectual disabilities" used internationally. Importantly, the Census  
56  
57  
58  
59  
60

1  
2  
3 differentiated between intellectual disabilities and specific learning disabilities;  
4  
5 and between intellectual disabilities and autism.  
6  
7  
8  
9

10 During the methodology development for Scotland's Census, 2011, cognitive  
11 question testing was undertaken on the questions on long-term health  
12 conditions and disabilities. This was to determine whether the questions were  
13 answered accurately, and to identify any changes needed to improve data  
14 quality and/or the acceptability of the way questions were phrased. Cognitive  
15 interviewing is a widely used approach to critically evaluate and improve  
16 survey questionnaires.<sup>18</sup> This approach enables researchers to modify survey  
17 material to enhance clarity. Retrospective probing was conducted with 102  
18 participants with a variety of sex, age, and health conditions and disabilities  
19 (including people with more than one of the conditions). They included people  
20 with autism, intellectual disabilities, dyslexia, dyspraxia, speech impairment,  
21 mental health conditions (both milder and more serious), and other long-term  
22 conditions.<sup>19</sup> Using the cognitive interviewing results, the question aimed to  
23 detect autism was improved and rephrased, to better capture this information.  
24  
25 The questions on intellectual disability, mental health condition, visual  
26 impairment, hearing impairment, and physical disability did not require any  
27 modifications.  
28  
29  
30  
31  
32  
33  
34  
35  
36  
37  
38  
39  
40  
41  
42  
43  
44  
45  
46  
47

48 The Census team imputed answers for the 14.7% who did not tick any of the  
49 boxes in question on long-term conditions, based on their free text answers for  
50 this question and answers to other health questions in the Census, which  
51 increased the completion rate to 97.4%. For the remaining 2.6%, the Census  
52 team assumed the most plausible explanation was that the person had no  
53  
54  
55  
56  
57  
58  
59  
60

1  
2  
3 long-term condition but did not see the “No condition” check box at the end of  
4 the question, and hence recorded them as having no conditions.  
5  
6  
7  
8  
9  
10

## 11 **Data Analysis**

12 We calculated the number and rate per 1,000 population of children and  
13 adults with co-occurring intellectual disabilities and autism. We then calculated  
14 the number and percentage of people with mental health conditions, deafness  
15 or partial hearing loss, blindness or partial sight loss, and physical disability, for  
16 those with co-occurring intellectual disabilities and autism, compared with  
17 individuals who do not have co-occurring intellectual disabilities and autism  
18 using chi-squared ( $\chi^2$ ) tests. For the whole population we then used logistic  
19 regression to calculate the odds ratios (OR: 95% confidence interval, 95% CI) of  
20 co-occurring intellectual disabilities and autism statistically predicting the  
21 binary response of having each of the four specific types of long-term health  
22 conditions, adjusted for age and sex. Sex was binary, with males being the  
23 reference group. Age was categorised into groups: 0-15, 16-24, 25-34, 35-44,  
24 45-54, 55-64, 65-74, 75+, with 0-15 years as the reference group. We repeated  
25 the regressions, including the interaction term of age x co-occurring  
26 intellectual disabilities and autism, as people with the most severe disabilities  
27 die earlier, which may affect the profile of additional health problems  
28 differently to that seen in the general population. The same reference groups  
29 were used. All analysis was conducted using SPSS software version 22.  
30  
31  
32  
33  
34  
35  
36  
37  
38  
39  
40  
41  
42  
43  
44  
45  
46  
47  
48  
49  
50  
51  
52  
53

## 54 **Patient and Public Involvement**

55 The Scottish Learning Disabilities Observatory, where this research was  
56 undertaken, has a specific remit for people with intellectual disabilities and  
57  
58  
59  
60

1  
2  
3 people with autism. Its steering group includes partners from third sector  
4 organisations and experts by experience, who approved the workplan for this  
5 project prior to it commencing. Results from this study will be disseminated for  
6 people with intellectual disabilities and autism in an easy-read version via the  
7 Scottish Learning Disabilities Observatory website, newsletters, and  
8 conference.  
9  
10  
11  
12  
13  
14  
15  
16  
17

## 18 **Results**

### 19 **Characteristics of the Sample**

20  
21  
22  
23  
24  
25 Scotland's Census, 2011, includes records on 5,295,403 people aged 0-75+  
26 years. 5,709/5,295,403 (1.08/1,000) people had co-occurring intellectual  
27 disabilities and autism; of whom 3,769 (66.0%) were male and 1,940 (44.0%)  
28 were female. Overall, 2,362/916,331 (2.58/1,000) of the total population of  
29 children (0-15 years), and 3,347/4,379,072 (0.76/1,000) adults (16-75+ years)  
30 had co-occurring intellectual disabilities and autism.  
31  
32  
33  
34  
35  
36  
37  
38  
39

40 Compared with the population who did not have co-occurring intellectual  
41 disabilities and autism, the population with co-occurring intellectual disabilities  
42 and autism had more males (66.0% versus 48.5%;  $\chi^2=703.5$ ;  $df=1$ ;  $p<0.001$ );  
43 were younger ( $\chi^2=3894.7$ ;  $df=7$ ;  $p<0.001$ ); were more likely to have been born  
44 in the UK rather than elsewhere ( $\chi^2=101.9$ ;  $df=1$ ;  $p<0.001$ ), revealing lesser  
45 geographic mobility; and were no different with regards to Caucasian versus  
46 non-Caucasian ethnicity ( $\chi^2=1.1$ ;  $df=1$ ;  $p=0.3$ ) (table 1).  
47  
48  
49  
50  
51  
52  
53  
54  
55  
56

57 - Insert table 1 about here -  
58  
59  
60

## Long-term Health Conditions

Table 2 shows the proportion of people with co-occurring intellectual disabilities and autism, who had each of the four additional long-term health conditions, compared to people who did not have co-occurring intellectual disabilities and autism. Some people in the sample had more than one long-term health condition.

- Insert table 2 about here -

### *Mental Health Condition*

Adjusting for age and sex, given the different distributions compared with the general population, having co-occurring intellectual disabilities and autism had an OR=25.553 (23.933-27.282, 95% CI) in predicting mental health conditions (table 3). When the interaction term was added (age x co-occurring intellectual disabilities and autism), co-occurring intellectual disabilities and autism had an OR=130.803 (117.131-146.070, 95% CI) in predicting a mental health condition (table 3).

- Insert table 3 about here -

### *Blindness or partial sight loss*

Adjusting for age and sex, having co-occurring intellectual disabilities and autism had an OR=36.781 (34.212-39.542, 95% CI) in predicting blindness or partial sight loss (table 4). When the interaction term was added (age x co-occurring intellectual disabilities and autism), co-occurring intellectual disabilities and autism had an OR=65.897 (58.743-73.922, 95% CI) in predicting blindness or partial sight loss (table 4).

1  
2  
3  
4  
5 - Insert table 4 about here -  
6  
7  
8

9  
10 *Deafness or partial hearing loss*

11 Adjusting for age and sex, having co-occurring intellectual disabilities and  
12 autism had an OR=11.331 (10.430-12.309, 95% CI) in predicting deafness or  
13 partial hearing loss (table 5). When the interaction term was added (age x co-  
14 occurring intellectual disabilities and autism), co-occurring intellectual  
15 disabilities and autism had an OR=21.996 (19.196-25.205, 95% CI) in predicting  
16 deafness or partial hearing loss (table 5).  
17  
18  
19  
20  
21  
22  
23  
24  
25  
26

27 - Insert table 5 about here -  
28  
29  
30

31 *Physical disability*

32 Adjusting for age and sex, having co-occurring intellectual disabilities and  
33 autism had an OR=61.159 (57.601-64.938, 95% CI) in predicting physical  
34 disability (table 6). When the interaction term was added (age x co-occurring  
35 intellectual disabilities and autism), co-occurring intellectual disabilities and  
36 autism had an OR=157.535 (144.577-171.655, 95% CI) in predicting physical  
37 disability (table 6).  
38  
39  
40  
41  
42  
43  
44  
45  
46  
47

48 - Insert table 6 about here -  
49  
50  
51

52 **Discussion**

53  
54  
55  
56  
57 **Principle findings**  
58  
59  
60

1  
2  
3 Mental health conditions, blindness or partial sight loss, deafness or partial  
4 hearing loss, and physical disability were all significantly more common in  
5 people with co-occurring intellectual disabilities and autism than people  
6 without these co-occurring conditions. The odds ratios after adjusting for age  
7 and sex and the interaction term, were substantial, being 131, 66, 22, and 158  
8 respectively. This is important as each of these conditions are disabling and can  
9 significantly impact an individual's quality of life. They contribute to high rates  
10 of multi-morbidity, which, on top of communication and cognitive problems  
11 due to autism and intellectual disabilities, renders assessments, diagnosis, and  
12 treatment of additional health problems more complex than for other people.  
13  
14  
15  
16  
17  
18  
19  
20  
21  
22  
23  
24  
25  
26

27 Across all age groups, blindness, deafness, and physical disability were more  
28 common in females than males with co-occurring intellectual disabilities and  
29 autism, unlike the gender ratios in people without co-occurring intellectual  
30 disabilities and autism. Mental health conditions were more common in males  
31 than females with co-occurring intellectual disabilities and autism, except for  
32 the 65+ year group, contrary to the gender ratios in other people. All  
33 conditions were more prevalent with increasing age in the people with co-  
34 occurring intellectual disabilities and autism, except for physical disability  
35 which was more common in the children/youth and older people than in the  
36 adults.  
37  
38  
39  
40  
41  
42  
43  
44  
45  
46  
47  
48  
49

### 50 **Comparison with existing literature**

51 The prevalence of these additional long-term health conditions has seldom  
52 been investigated in people with co-occurring intellectual disabilities and  
53 autism, particularly in comparison with other people, and never, to our  
54 knowledge, as a total population study. All of the long-term health conditions  
55  
56  
57  
58  
59  
60



1  
2  
3 were more common than in those without co-occurring intellectual disabilities  
4 and autism.  
5  
6  
7

8  
9  
10 Smaller, less representative studies have reported a higher rate of mental  
11 health conditions in adults and youth with co-occurring intellectual disabilities  
12 and autism compared with those with intellectual disabilities and without  
13 autism,<sup>9-13</sup> but not all.<sup>14</sup> People with autism have been reported to have more  
14 mental health conditions than other people (OR=9 in adults and OR=16 in  
15 children),<sup>6,7</sup> as have people with intellectual disabilities compared with other  
16 people (OR=7),<sup>3</sup> using the same Scotland's Census, 2011 data as in this current  
17 paper, whereas the comparable ratio we now report for people with co-  
18 occurring intellectual disabilities and autism for mental health conditions was  
19 OR=26. Having the co-occurring conditions therefore presents a much higher  
20 risk of mental health conditions than either intellectual disabilities or autism  
21 on their own.  
22  
23  
24  
25  
26  
27  
28  
29  
30  
31  
32  
33  
34  
35  
36  
37  
38  
39  
40  
41  
42  
43  
44  
45  
46  
47  
48  
49  
50  
51  
52  
53  
54  
55  
56  
57  
58  
59  
60

The previous small study of youth reported lower rates of visual and hearing  
impairments in those with co-occurring intellectual disabilities and autism  
(38.9% and 13.9%) compared with those with intellectual disabilities but  
without autism (50% and 19.4%).<sup>12</sup> This was in contrast with the larger study  
reporting more autistic symptoms in adults with intellectual disabilities and  
visual impairments than in adults with intellectual disabilities but without  
visual impairments.<sup>15</sup> Adults with autism have been reported to have more  
blindness or partial sight loss, and deafness or partial hearing loss than other  
people (12.1% and 17.5%),<sup>6</sup> as have children with autism (3.5% and 2.9%),<sup>7</sup> and  
people (children and adults combined) with intellectual disabilities compared  
with other people (13.1% and 12.4%),<sup>3</sup> using the same Scotland's Census 2011

1  
2  
3 as in this current paper. This current study found the comparable rates for  
4 people with co-occurring intellectual disabilities and autism for blindness or  
5 partial sight loss, and deafness or partial hearing loss was 21.7% and 19.3% for  
6 adults, and 16.6% and 10.3% for children. Having the co-occurring conditions  
7 of intellectual disabilities and autism therefore presents a much higher risk of  
8 sensory impairments than for children and adults with autism, and for people  
9 with intellectual disabilities (although children were not separately studied in  
10 the previous report).  
11  
12  
13  
14  
15  
16  
17  
18  
19  
20  
21

22 Regarding physical disability, 32.6% of people with intellectual disabilities were  
23 previously reported to have physical disability.<sup>3</sup> Of people with autism, 24.0%  
24 of adults and 10.7% of children reported physical disability.<sup>6,7</sup> These rates are  
25 lower than those we report in this current study of people with co-occurring  
26 intellectual disabilities and autism – 45.6% of children and 42.2% of adults.  
27  
28  
29  
30  
31  
32  
33  
34

### 35 **Strengths and limitations**

36  
37 Strengths of the study include its large scale and general population  
38 comparison group, whole population coverage and very high response rate so  
39 the results are representative of the whole population. Intellectual disabilities,  
40 autism, and the long-term health conditions were enquired about  
41 systematically for everyone in the population. We believe the results are  
42 therefore generalisable to other high-income countries. The cognitive question  
43 testing during the design of the Census is a further strength. The Census had  
44 clear categories to distinguish between intellectual disabilities, specific learning  
45 disability (like dyslexia), and autism.  
46  
47  
48  
49  
50  
51  
52  
53  
54  
55  
56  
57  
58  
59  
60

1  
2  
3 Limitations include the proxy-reporting, which may, or may not reflect self-  
4 reports. However, without proxy-reports, we would have no information on  
5 people unable to self-report due to their disabilities, and a previous review on  
6 the topic concluded that overall, proxy reports are a useful addition to  
7 determine aspects of well-being in people with intellectual disabilities.<sup>20</sup>  
8  
9 Additionally, people were reported who were known to have  
10 autism/Asperger's syndrome, intellectual disabilities, and the additional long-  
11 term health conditions, rather than detailed individual research assessments  
12 being undertaken which are clearly not possible in such large population  
13 studies, and may therefore be subject to a degree of error which we were not  
14 able to check.  
15  
16  
17  
18  
19  
20  
21  
22  
23  
24  
25  
26  
27  
28

### 29 **Implications**

30  
31 There is a greater than double disadvantage for people with co-occurring  
32 intellectual disabilities and autism, in terms of additional long-term health  
33 conditions. We found that, and quantified the extent to which mental health  
34 conditions, sensory impairments, and physical disabilities are more common  
35 than in people without co-occurring intellectual disabilities and autism, and in  
36 people with just intellectual disabilities or just autism. This may well impact on  
37 quality of life. It raises challenges for staff working with people with these co-  
38 occurring conditions in view of the additional complexity in assessments,  
39 diagnoses, and interventions, as sensory impairments and mental health  
40 conditions in particular, interact with the persons pre-existing communication  
41 and cognitive problems in this context. Therefore, it is important that these co-  
42 occurring conditions are planned for with staff being trained, equipped,  
43 resourced and prepared to address the challenge.  
44  
45  
46  
47  
48  
49  
50  
51  
52  
53  
54  
55  
56  
57  
58  
59  
60

## References

1. Cooper S-A, McLean G, Guthrie B, McConnachie A, Mercer S, Sullivan F, Morrison J. Multiple physical and mental health comorbidity in adults with intellectual disabilities: population-based cross-sectional analysis. *BMC Family Practice* 2015; 16: 110.
2. Hughes-McCormack LA, Rydzewska E, Henderson A., Rintoul J, Macintyre C, Cooper S-A. Prevalence and general health status of people with intellectual disabilities in Scotland -a total population study. *J Epidemiol Community Health* 2018; 72: 78–85.
3. Hughes-McCormack LA, Rydzewska E, Henderson A, Rintoul J, Macintyre C, Cooper S-A. Prevalence of mental ill-health and relationship with physical health in a whole country population of 26,349 people with intellectual disabilities, compared with the general population. *Br J Psychiatry Open*, 2017; 3: 243-248.
4. Kinnear D, Morrison J, Allan L, Henderson A, Smiley E, & Cooper S-A. Prevalence of physical conditions and multimorbidity in a cohort of adults with intellectual disabilities with and without Down syndrome: cross-sectional study. *BMJ Open* 2018; 8:e018292.
5. Croen LA, Zerbo O, Qian Y, Massolo ML, Rich S, Sidney S, Kripke C. The health status of adults on the autism spectrum. *Autism* 2015; 19:814–823.
6. Rydzewska E, Hughes-McCormack LA, Gillberg C, Henderson A, MacIntyre C, Rintoul J, & Cooper S-A. Prevalence of long-term health conditions in adults with autism: observational study of a whole country population. *BMJ Open* 2018a; 8(8): e023945.
7. Rydzewska E, Hughes-McCormack LA, Gillberg C, Henderson A, MacIntyre C, Rintoul J, Cooper S-A. Prevalence of sensory impairments, physical and

- 1  
2  
3 intellectual disabilities, and mental health in children and young people  
4 with self/proxy-reported autism - observational study of a whole country  
5 population. *Autism* 2018; 23:1201-9.  
6  
7  
8  
9  
10 8. Dunn K, Rydzewska E, Macintyre C, Rintoul J, & Cooper S-A. The prevalence  
11 and general health status of people with intellectual disabilities and autism  
12 co-occurring together: a total population study. *J Intellectual Disabilit Res*  
13 2018, 63: 277-285.  
14  
15  
16  
17  
18 9. Cervantes PE, Matson JL. Comorbid symptomology in adults with autism  
19 spectrum disorder and intellectual disability. *J Autism Dev Disord* 2015;  
20 45(12): 3961-3970.  
21  
22  
23  
24  
25 10. Bakken TL, Helverschou SB, Eilertsen DE, Heggelund T, Myrbakk E, &  
26 Martinsen, H. Psychiatric disorders in adolescents and adults with autism  
27 and intellectual disability: A representative study in one county in Norway.  
28 *Res Dev Disabil* 2010; 31: 1669-1677.  
29  
30  
31  
32  
33 11. Tsakanikos E, Sturmey P, Costello H, Holt G, Bouras N. Referral trends in  
34 mental health services for adults with intellectual disability and autism  
35 spectrum disorders. *Autism* 2007;11:9-17.  
36  
37  
38  
39  
40 12. Bradley E, Bolton P. Episodic psychiatric disorders in teenagers with learning  
41 disabilities with and without autism. *Br J Psychiatr* 2006; 189:361-6.  
42  
43  
44 13. Hill J, Furniss F. Patterns of emotional and behavioural disturbance  
45 associated with autistic traits in young people with severe intellectual  
46 disabilities and challenging behaviours. *Res Dev Disabil* 2006; 27:517-28.  
47  
48  
49  
50 14. Melville CA, Cooper S-A, Morrison J, Smiley E, Allan L, Jackson A, Finlayson J,  
51 Mantry D. The prevalence and incidence of mental ill-health in adults with  
52 autism and intellectual disabilities. *J Autism Dev Disord* 2008; 38:1676-88.  
53  
54  
55  
56  
57  
58  
59  
60

- 1  
2  
3  
4  
5  
6  
7  
8  
9  
10  
11  
12  
13  
14  
15  
16  
17  
18  
19  
20  
21  
22  
23  
24  
25  
26  
27  
28  
29  
30  
31  
32  
33  
34  
35  
36  
37  
38  
39  
40  
41  
42  
43  
44  
45
15. Kiani, R, Bhaumik, S, Tyrer, F, Bankart, J, Miller, H, Cooper, S-A, Brugha, T. The relationship between autism spectrum disorder and visual impairments among adults with intellectual disability. *Autism Res* 2019; 12:1411-1422.
16. National Records of Scotland. Scotland's Census, 2011. Supporting information. *National Records of Scotland*. 2011 <http://www.scotlandscensus.gov.uk/supporting-information>.
17. Office for National Statistics. Survey Methodology Bulletin No. 69 – September 2011. 2011 <https://webarchive.nationalarchives.gov.uk/20160108193745/http://www.ons.gov.uk/guide-method/method-quality/survey-methodologybulletin/smb-69/index.html>.
18. Willis GB. Cognitive interviewing: A tool for improving questionnaire design. Sage Publications; 2004.
19. General Register Office for Scotland. 2011 Census Question Testing- The Health and Disability Questions (2009). 2009 <https://www.scotlandscensus.gov.uk/documents/research/2011-census-healthdisability-questions.pdf>.
20. Perkins EA, Berkman KA. Into the unknown: Aging with autism spectrum disorders. *Am J Intellect Dev Disabil* 2012; 117:478-96.

## 46 47 48 49 50 51 52 53 54 55 56 57 58 59 60

### Funding

This work was supported by the UK Medical Research Council, grant number: MC\_PC\_1717), and the Scottish Government via the Scottish Learning Disabilities Observatory.

1  
2  
3 The study sponsor and funders had no role in the study design; in the  
4 collection, analysis, and interpretation of data; in the writing of the report; and  
5  
6 in the decision to submit the article for publication.  
7  
8  
9

10  
11 The researchers are independent from the funders.  
12  
13  
14

## 15 16 **Competing interests**

17  
18  
19  
20 The authors declare no competing interests.  
21  
22  
23

## 24 25 **Author's contributions**

26  
27  
28  
29 KD analysed and interpreted the data, and wrote the first draft of the  
30 manuscript. ER contributed to data access, data interpretation, and drafting  
31 the manuscript. S-AC conceived and managed the project, interpreted data,  
32 and contributed to writing the manuscript. All approved the final version of the  
33 manuscript. S-AC is the study guarantor.  
34  
35  
36  
37  
38  
39  
40  
41

## 42 43 **Data sharing**

44  
45  
46 Data is available via National Records of Scotland, following project approval.  
47  
48  
49  
50

## 51 52 **Acknowledgments**

53  
54  
55 We thank the National Records of Scotland Census team, and the Scottish population who  
56 completed the Census.  
57  
58  
59  
60

Table 1: Characteristics of people with and without, co-occurring intellectual disabilities and autism

|                                | <b>People without co-occurring intellectual disabilities and autism</b><br>N=5,289,694 (100%)<br>Number (%) | <b>People with co-occurring intellectual disabilities and autism</b><br>N=5,709 (100%)<br>Number (%) |
|--------------------------------|-------------------------------------------------------------------------------------------------------------|------------------------------------------------------------------------------------------------------|
| <b>Gender*</b>                 |                                                                                                             |                                                                                                      |
| Males                          | 2,563,675 (48.5%)                                                                                           | 3,769 (66.0%)                                                                                        |
| Females                        | 2,726,019 (51.5%)                                                                                           | 1,940 (44.0%)                                                                                        |
| <b>Age groups*</b>             |                                                                                                             |                                                                                                      |
| 0-15                           | 913,969 (17.3%)                                                                                             | 2,362 (41.4%)                                                                                        |
| 16-24                          | 631,094 (11.9%)                                                                                             | 1,394 (24.4%)                                                                                        |
| 25-34                          | 666,725 (12.6%)                                                                                             | 602 (10.5%)                                                                                          |
| 35-44                          | 734,304 (13.9%)                                                                                             | 450 (7.9%)                                                                                           |
| 45-54                          | 786,355 (14.9%)                                                                                             | 401 (7.0%)                                                                                           |
| 55-64                          | 667,157 (12.6%)                                                                                             | 256 (4.5%)                                                                                           |
| 65+                            | 890,090 (16.8%)                                                                                             | 244 (4.3%)                                                                                           |
| <b>Country of birth*</b>       |                                                                                                             |                                                                                                      |
| UK                             | 4,920,614 (93.0%)                                                                                           | 5,505 (96.4%)                                                                                        |
| Other Europe                   | 172,160 (3.3%)                                                                                              | 83 (1.5%)                                                                                            |
| Africa                         | 46,708 (0.9%)                                                                                               | 34 (0.6%)                                                                                            |
| Middle East and Asia           | 104,480 (2.0%)                                                                                              | 50 (0.9%)                                                                                            |
| The Americas and the Caribbean | 33,325 (0.6%)                                                                                               | 28 (0.5%)                                                                                            |
| Other                          | 12,407 (0.2%)                                                                                               | 9 (0.2%)                                                                                             |
| <b>Ethnicity</b>               |                                                                                                             |                                                                                                      |
| White                          | 5,078,910 (96.0%)                                                                                           | 5,497 (96.3%)                                                                                        |
| Asian                          | 140,542 (2.7%)                                                                                              | 136 (2.4%)                                                                                           |
| Mixed/multiple ethnicities     | 19,775 (0.4%)                                                                                               | 40 (0.7%)                                                                                            |



1  
2  
3  
4  
5  
6  
7  
8  
9  
10  
11  
12  
13  
14  
15  
16  
17  
18  
19  
20  
21  
22  
23  
24  
25  
26  
27  
28  
29  
30  
31  
32  
33  
34  
35  
36  
37  
38  
39  
40  
41  
42  
43  
44  
45  
46

|                     |               |           |
|---------------------|---------------|-----------|
| African             | 29,615 (0.6%) | 23 (0.4%) |
| Caribbean or black  | 6,536 (0.1%)  | 4 (0.1%)  |
| Other ethnic groups | 14,316 (0.3%) | 9 (0.2%)  |

\*People with co-occurring intellectual disabilities and autism versus people without co-occurring intellectual disabilities and autism; p<0.01

For peer review only

Table 2: Prevalence of comorbidities in people with and without co-occurring intellectual disabilities and autism by age and sex

| People with co-occurring intellectual disabilities and autism    |                                         |                          |                               |                                    |                             |                                 |                                      |                           |                               |
|------------------------------------------------------------------|-----------------------------------------|--------------------------|-------------------------------|------------------------------------|-----------------------------|---------------------------------|--------------------------------------|---------------------------|-------------------------------|
| Condition                                                        | Children/youth, 0-15 years<br>N=2,362   |                          |                               | Adults, 16-64 years<br>N=3,103     |                             |                                 | Older people, 65+ years<br>N=244     |                           |                               |
|                                                                  | M<br>N=1,563<br>(100%)                  | F<br>N=799<br>(100%)     | Total<br>N=2,362<br>(100%)    | M<br>N= 2,073<br>(100%)            | F<br>N= 1,030<br>(100%)     | Total<br>N= 3,103<br>(100%)     | M<br>N= 133<br>(100%)                | F<br>N= 111<br>(100%)     | Total<br>N= 244<br>(100%)     |
| <b>Mental health condition</b>                                   | 328<br>(21.0%)                          | 152<br>(19.0%)           | 480<br>(20.3%)                | 768<br>(37.0%)                     | 377<br>(36.6%)              | 1145<br>(36.9%)                 | 80<br>(60.2%)                        | 80<br>(72.1%)             | 160<br>(65.6%)                |
| <b>Blindness/partial sight loss</b>                              | 214<br>(13.7%)                          | 177<br>(22.2%)           | 391<br>(16.6%)                | 355<br>(17.1%)                     | 220<br>(21.4%)              | 575<br>(18.5%)                  | 71<br>(53.3%)                        | 80<br>(72.1%)             | 151<br>(61.9%)                |
| <b>Deafness/partial hearing loss</b>                             | 148<br>(9.5%)                           | 95<br>(11.9%)            | 243<br>(10.3%)                | 301<br>(14.5%)                     | 190<br>(18.4%)              | 491<br>(15.8%)                  | 73<br>(54.9%)                        | 81<br>(73.0%)             | 154<br>(63.1%)                |
| <b>Physical disability</b>                                       | 618<br>(39.5%)                          | 458<br>(57.3%)           | 1,076<br>(45.6%)              | 719<br>(34.7%)                     | 508<br>(49.3%)              | 1,227<br>(39.5%)                | 86<br>(64.7%)                        | 99<br>(89.2%)             | 185<br>(75.8%)                |
| People without co-occurring intellectual disabilities and autism |                                         |                          |                               |                                    |                             |                                 |                                      |                           |                               |
| Condition                                                        | Children/youth, 0-15 years<br>N=913,969 |                          |                               | Adults, 16-64 years<br>N=3,485,635 |                             |                                 | Older people, 65+ years<br>N=890,090 |                           |                               |
|                                                                  | M<br>N=467,543<br>(100%)                | F<br>N=446,426<br>(100%) | Total<br>N= 913,969<br>(100%) | M<br>N= 1,712,526<br>(100%)        | F<br>N= 1,773,109<br>(100%) | Total<br>N= 3,485,635<br>(100%) | M<br>N= 383,606<br>(100%)            | F<br>N= 506,484<br>(100%) | Total<br>N= 890,090<br>(100%) |
| <b>Mental health condition</b>                                   | 1,861<br>(0.4%)                         | 980<br>(0.2%)            | 2,841<br>(0.3%)               | 92,308<br>(5.4%)                   | 95,108<br>(5.4%)            | 187,416<br>(5.4%)               | 14,760<br>(3.8%)                     | 26,141<br>(5.2%)          | 40,901<br>(4.6%)              |
| <b>Blindness/partial sight loss</b>                              | 1,793<br>(0.4%)                         | 1,439<br>(0.3%)          | 3,232<br>(0.4%)               | 24,129<br>(1.4%)                   | 16,954<br>(1.0%)            | 41,083<br>(1.2%)                | 30,389<br>(7.9%)                     | 49,839<br>(9.8%)          | 80,228<br>(9.0%)              |
| <b>Deafness/partial hearing loss</b>                             | 2,731<br>(0.6%)                         | 2,225<br>(0.5%)          | 4,956<br>(0.5%)               | 70,543<br>(4.1%)                   | 48,727<br>(2.7%)            | 119,270<br>(3.4%)               | 111,447<br>(29.1%)                   | 114,393<br>(22.6%)        | 225,840<br>(25.4%)            |
| <b>Physical disability</b>                                       | 3,637<br>(0.8%)                         | 2,799<br>(0.6%)          | 6,436<br>(0.7%)               | 81,655<br>(4.8%)                   | 82,968<br>(4.7%)            | 164,623<br>(4.7%)               | 73,759<br>(19.2%)                    | 109,103<br>(21.5%)        | 182,862<br>(20.5%)            |

Table 3: Independent predictors of mental health conditions in the whole population

| Characteristic                                    |                                                   | Regression 1 |                         | Regression 2 (including the interaction term: age x co-occurring intellectual disabilities and autism) |                         |
|---------------------------------------------------|---------------------------------------------------|--------------|-------------------------|--------------------------------------------------------------------------------------------------------|-------------------------|
|                                                   |                                                   | Odds ratio   | 95% confidence interval | Odds ratio                                                                                             | 95% confidence interval |
| Co-occurring intellectual disabilities and autism | Not present (reference)                           | -            | -                       | -                                                                                                      | -                       |
|                                                   | Co-occurring intellectual disabilities and autism | 25.553       | 23.933-27.282           | 130.803                                                                                                | 117.131-146.070         |
| Gender                                            | Male (reference)                                  | -            | -                       | -                                                                                                      | -                       |
|                                                   | Female                                            | 1.275        | 1.264-1.286             | 1.275                                                                                                  | 1.264-1.286             |
| Sex                                               | 0-15 (reference)                                  | -            | -                       | -                                                                                                      | -                       |
|                                                   | 16-24                                             | 9.449        | 9.039-9.877             | 11.322                                                                                                 | 10.781-11.890           |
|                                                   | 25-34                                             | 21.168       | 20.285-22.090           | 25.305                                                                                                 | 24.134-26.532           |
|                                                   | 35-44                                             | 29.725       | 28.497-31.004           | 35.493                                                                                                 | 33.866-37.199           |
|                                                   | 45-54                                             | 29.186       | 27.983-30.441           | 34.835                                                                                                 | 33.239-36.507           |
|                                                   | 55-64                                             | 22.633       | 21.633-23.617           | 26.997                                                                                                 | 25.750-28.304           |
|                                                   | 65+                                               | 19.319       | 18.518-20.155           | 23.005                                                                                                 | 21.947-24.115           |
| Age x both intellectual disabilities and autism   | 0-15 (reference)                                  | -            | -                       | -                                                                                                      | -                       |
|                                                   | 16-24                                             | -            | -                       | 0.152                                                                                                  | 0.129-0.178             |
|                                                   | 25-34                                             | -            | -                       | 0.101                                                                                                  | 0.083-0.123             |
|                                                   | 35-44                                             | -            | -                       | 0.083                                                                                                  | 0.067-0.104             |
|                                                   | 45-54                                             | -            | -                       | 0.089                                                                                                  | 0.071-0.112             |
|                                                   | 55-64                                             | -            | -                       | 0.118                                                                                                  | 0.090-0.154             |
|                                                   | 65+                                               | -            | -                       | 0.308                                                                                                  | 0.238-0.423             |
| Constant                                          | -                                                 | 0.002        | -                       | 0.002                                                                                                  | -                       |

Table 4: Independent predictors of blindness/partial sight loss in the whole population

| Characteristic                                    |                                                   | Regression 1 |                         | Regression 2 (including the interaction term: age x co-occurring intellectual disabilities and autism) |                         |
|---------------------------------------------------|---------------------------------------------------|--------------|-------------------------|--------------------------------------------------------------------------------------------------------|-------------------------|
|                                                   |                                                   | Odds ratio   | 95% confidence interval | Odds ratio                                                                                             | 95% confidence interval |
| Co-occurring intellectual disabilities and autism | Not present (reference)                           | -            | -                       | -                                                                                                      | -                       |
|                                                   | Co-occurring intellectual disabilities and autism | 36.781       | 34.212-39.542           | 65.897                                                                                                 | 58.743-73.922           |
| Sex                                               | Male (reference)                                  | -            | -                       | -                                                                                                      | -                       |
|                                                   | Female                                            | 1.011        | 0.999-1.022             | 1.011                                                                                                  | 0.999-1.022             |
| Age                                               | 0-15 (reference)                                  | -            | -                       | -                                                                                                      | -                       |
|                                                   | 16-24                                             | 1.557        | 1.482-1.636             | 1.663                                                                                                  | 1.579-1.751             |
|                                                   | 25-34                                             | 1.824        | 1.739-1.913             | 1.914                                                                                                  | 1.821-2.011             |
|                                                   | 35-44                                             | 2.548        | 2.439-2.663             | 2.687                                                                                                  | 2.567-2.813             |
|                                                   | 45-54                                             | 4.416        | 4.241-4.599             | 4.668                                                                                                  | 4.475-4.870             |
|                                                   | 55-64                                             | 7.503        | 7.215-7.803             | 7.928                                                                                                  | 7.609-8.260             |
| Age x both intellectual disabilities and autism   | 65+                                               | 31.064       | 29.947-32.222           | 32.750                                                                                                 | 31.512-34.036           |
|                                                   | 0-15 (reference)                                  | -            | -                       | -                                                                                                      | -                       |
|                                                   | 16-24                                             | -            | -                       | 0.433                                                                                                  | 0.354-0.528             |
|                                                   | 25-34                                             | -            | -                       | 0.669                                                                                                  | 0.521-0.844             |
|                                                   | 35-44                                             | -            | -                       | 0.529                                                                                                  | 0.411-0.681             |
|                                                   | 45-54                                             | -            | -                       | 0.368                                                                                                  | 0.286-0.474             |
| Constant                                          | 55-64                                             | -            | -                       | 0.278                                                                                                  | 0.208-0.372             |
|                                                   | 65+                                               | -            | -                       | 0.250                                                                                                  | 0.188-0.331             |
| Constant                                          |                                                   | -            | 0.003                   | -                                                                                                      | 0.003                   |

Table 5: Independent predictors of deafness/partial hearing loss in the whole population

| Characteristic                                    |                                                   | Regression 1 |                         | Regression 2 (including the interaction term: age x co-occurring intellectual disabilities and autism) |                         |
|---------------------------------------------------|---------------------------------------------------|--------------|-------------------------|--------------------------------------------------------------------------------------------------------|-------------------------|
|                                                   |                                                   | Odds ratio   | 95% confidence interval | Odds ratio                                                                                             | 95% confidence interval |
| Co-occurring intellectual disabilities and autism | Not present (reference)                           | -            | -                       | -                                                                                                      | -                       |
|                                                   | Co-occurring intellectual disabilities and autism | 11.331       | 10.430-12.309           | 21.996                                                                                                 | 19.196-25.205           |
| Gender                                            | Male (reference)                                  | -            | -                       | -                                                                                                      | -                       |
|                                                   | Female                                            | 0.687        | 0.682-0.693             | 0.688                                                                                                  | 0.682-0.693             |
| Sex                                               | 0-15 (reference)                                  | -            | -                       | -                                                                                                      | -                       |
|                                                   | 16-24                                             | 1.557        | 1.496-1.621             | 1.588                                                                                                  | 1.524-1.654             |
|                                                   | 25-34                                             | 2.358        | 2.274-2.446             | 2.408                                                                                                  | 2.321-2.499             |
|                                                   | 35-44                                             | 4.237        | 4.099-4.379             | 4.347                                                                                                  | 4.203-4.495             |
|                                                   | 45-54                                             | 8.546        | 8.285-8.815             | 8.769                                                                                                  | 8.496-9.051             |
|                                                   | 55-64                                             | 18.761       | 18.204-19.336           | 19.243                                                                                                 | 18.659-19.845           |
| Age x both intellectual disabilities and autism   | 65+                                               | 69.646       | 67.633-71.719           | 71.378                                                                                                 | 69.269-73.552           |
|                                                   | 0-15 (reference)                                  | -            | -                       | -                                                                                                      | -                       |
|                                                   | 16-24                                             | -            | -                       | 0.633                                                                                                  | 0.507-0.790             |
|                                                   | 25-34                                             | -            | -                       | 0.735                                                                                                  | 0.569-0.948             |
|                                                   | 35-44                                             | -            | -                       | 0.394                                                                                                  | 0.296-0.523             |
|                                                   | 45-54                                             | -            | -                       | 0.288                                                                                                  | 0.219-0.378             |
| Constant                                          | 55-64                                             | -            | -                       | 0.215                                                                                                  | 0.159-0.289             |
|                                                   | 65+                                               | -            | -                       | 0.222                                                                                                  | 0.165-0.298             |
| Constant                                          |                                                   | -            | 0.006                   | -                                                                                                      | 0.006                   |

Table 6: Independent predictors of physical disability in the whole population

| Characteristic                                    |                                                   | Regression 1 |                         | Regression 2 (including the interaction term: age x co-occurring intellectual disabilities and autism) |                         |
|---------------------------------------------------|---------------------------------------------------|--------------|-------------------------|--------------------------------------------------------------------------------------------------------|-------------------------|
|                                                   |                                                   | Odds ratio   | 95% confidence interval | Odds ratio                                                                                             | 95% confidence interval |
| Co-occurring intellectual disabilities and autism | Not present (reference)                           | -            | -                       | -                                                                                                      | -                       |
|                                                   | Co-occurring intellectual disabilities and autism | 61.159       | 57.601-64.938           | 157.535                                                                                                | 144.577-171.655         |
| Gender                                            | Male (reference)                                  | -            | -                       | -                                                                                                      | -                       |
|                                                   | Female                                            | 1.063        | 1.055-1.070             | 1.063                                                                                                  | 1.055-1.070             |
| Sex                                               | 0-15 (reference)                                  | -            | -                       | -                                                                                                      | -                       |
|                                                   | 16-24                                             | 1.440        | 1.388-1.495             | 1.573                                                                                                  | 1.513-1.637             |
|                                                   | 25-34                                             | 2.603        | 2.519-2.690             | 2.857                                                                                                  | 2.760-2.958             |
|                                                   | 35-44                                             | 5.869        | 5.699-6.043             | 6.465                                                                                                  | 6.267-6.670             |
|                                                   | 45-54                                             | 10.606       | 10.312-10.908           | 11.662                                                                                                 | 11.318-12.017           |
|                                                   | 55-64                                             | 20.730       | 20.166-21.310           | 22.756                                                                                                 | 22.096-23.436           |
|                                                   | 65+                                               | 43.680       | 42.517-44.875           | 47.894                                                                                                 | 46.530-49.298           |
| Age x both intellectual disabilities and autism   | 0-15 (reference)                                  | -            | -                       | -                                                                                                      | -                       |
|                                                   | 16-24                                             | -            | -                       | 0.410                                                                                                  | 0.355-0.472             |
|                                                   | 25-34                                             | -            | -                       | 0.344                                                                                                  | 0.287-0.414             |
|                                                   | 35-44                                             | -            | -                       | 0.123                                                                                                  | 0.100-0.152             |
|                                                   | 45-54                                             | -            | -                       | 0.075                                                                                                  | 0.061-0.094             |
|                                                   | 55-64                                             | -            | -                       | 0.044                                                                                                  | 0.034-0.057             |
|                                                   | 65+                                               | -            | -                       | 0.050                                                                                                  | 0.039-0.066             |
| Constant                                          | -                                                 | 0.006        | -                       | 0.005                                                                                                  | -                       |

# BMJ Open

**The prevalence of mental health conditions, sensory impairments, and physical disability in people with co-occurring intellectual disabilities and autism compared with other people – a cross-sectional total population study of 5,295,403 people in Scotland**

|                                 |                                                                                                                                                                                                                                                                                   |
|---------------------------------|-----------------------------------------------------------------------------------------------------------------------------------------------------------------------------------------------------------------------------------------------------------------------------------|
| Journal:                        | <i>BMJ Open</i>                                                                                                                                                                                                                                                                   |
| Manuscript ID                   | bmjopen-2019-035280.R1                                                                                                                                                                                                                                                            |
| Article Type:                   | Original research                                                                                                                                                                                                                                                                 |
| Date Submitted by the Author:   | 23-Jan-2020                                                                                                                                                                                                                                                                       |
| Complete List of Authors:       | Dunn, Kirsty; University of Glasgow, Health and Wellbeing<br>Rydzewska, Ewelina; University of Glasgow, Institute of Health and Wellbeing<br>Fleming, Michael ; University of Glasgow, Public Health<br>Cooper, Sally-Ann; Glasgow University , Institute of Health and Wellbeing |
| <b>Primary Subject Heading</b>: | Mental health                                                                                                                                                                                                                                                                     |
| Secondary Subject Heading:      | Public health                                                                                                                                                                                                                                                                     |
| Keywords:                       | MENTAL HEALTH, Adult psychiatry < PSYCHIATRY, PUBLIC HEALTH                                                                                                                                                                                                                       |
|                                 |                                                                                                                                                                                                                                                                                   |

SCHOLARONE™  
Manuscripts

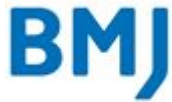

I, the Submitting Author has the right to grant and does grant on behalf of all authors of the Work (as defined in the below author licence), an exclusive licence and/or a non-exclusive licence for contributions from authors who are: i) UK Crown employees; ii) where BMJ has agreed a CC-BY licence shall apply, and/or iii) in accordance with the terms applicable for US Federal Government officers or employees acting as part of their official duties; on a worldwide, perpetual, irrevocable, royalty-free basis to BMJ Publishing Group Ltd ("BMJ") its licensees and where the relevant Journal is co-owned by BMJ to the co-owners of the Journal, to publish the Work in this journal and any other BMJ products and to exploit all rights, as set out in our [licence](#).

The Submitting Author accepts and understands that any supply made under these terms is made by BMJ to the Submitting Author unless you are acting as an employee on behalf of your employer or a postgraduate student of an affiliated institution which is paying any applicable article publishing charge ("APC") for Open Access articles. Where the Submitting Author wishes to make the Work available on an Open Access basis (and intends to pay the relevant APC), the terms of reuse of such Open Access shall be governed by a Creative Commons licence – details of these licences and which [Creative Commons](#) licence will apply to this Work are set out in our licence referred to above.

Other than as permitted in any relevant BMJ Author's Self Archiving Policies, I confirm this Work has not been accepted for publication elsewhere, is not being considered for publication elsewhere and does not duplicate material already published. I confirm all authors consent to publication of this Work and authorise the granting of this licence.



1  
2  
3 The prevalence of mental health conditions, sensory impairments, and physical  
4 disability in people with co-occurring intellectual disabilities and autism  
5 compared with other people – a cross-sectional total population study of  
6  
7  
8  
9  
10 5,295,403 people in Scotland

11  
12 Dunn, K., Rydzewska, E., Fleming, M., Cooper, S-A.

13  
14  
15  
16 Kirsty Dunn

17  
18 Department of mental health and wellbeing, Gartnavel Royal Hospital, Administration  
19 Building, 1st floor, 1055 Great Western Road, Glasgow G12 0XH, UK

20  
21 [Kirsty.wright@glasgow.ac.uk](mailto:Kirsty.wright@glasgow.ac.uk) Tel: 0141 211 3889  
22  
23

24  
25 Ewelina Rydzewska

26  
27 Department of mental health and wellbeing, Gartnavel Royal Hospital, Administration  
28 Building, 1st floor, 1055 Great Western Road, Glasgow G12 0XH, UK

29  
30 [Ewelina.rydzewska@glasgow.ac.uk](mailto:Ewelina.rydzewska@glasgow.ac.uk) Tel: 0141 211 3889  
31  
32

33  
34 Michael Fleming

35  
36 Department of public health, Institute of Health and Wellbeing, University of Glasgow, 1  
37 Lilybank Gardens, Glasgow, G12 8RZ, UK

38  
39 [Michael.fleming@glasgow.ac.uk](mailto:Michael.fleming@glasgow.ac.uk) Tel: +44 (0) 141 330 3415  
40  
41

42  
43 Sally-Ann Cooper

44  
45 Department of mental health and wellbeing, Gartnavel Royal Hospital, Administration  
46 Building, 1st floor, 1055 Great Western Road, Glasgow G12 0XH, UK

47  
48 [Sally-ann.cooper@glasgow.ac.uk](mailto:Sally-ann.cooper@glasgow.ac.uk) Tel: +44 (0)141 211 0690/3701 Fax: +44 (0)141 211 0356  
49  
50

51  
52  
53 **Word count:** 4,009  
54

55  
56 **Keywords:** Intellectual disabilities, autism, mental health conditions, sensory impairments,  
57 vision, hearing, physical disability, co-morbidity.  
58  
59  
60

## Abstract

**Objectives:** To investigate prevalence of mental health conditions, sensory impairments, and physical disability in children, adults, and older adults with co-occurring intellectual disabilities and autism (given its frequent co-occurrence), compared with the general population.

**Design:** Whole country cross-sectional cohort study.

**Setting:** General community.

**Participants:** 5,709 people with co-occurring intellectual disabilities and autism (both conditions together), compared with 5,289,694 other people.

**Outcome measures:** Rates and odds ratios (OR) with 95% confidence intervals (95% CI) for mental health conditions, visual impairment, hearing impairment and physical disability in people with co-occurring intellectual disabilities and autism compared with other people (adjusted for age, sex, and interaction between age and co-occurring intellectual disabilities and autism).

**Results:** All four long-term conditions were markedly more common in children, adults, and older adults with co-occurring intellectual disabilities and autism compared with other people. For mental health, OR=130.8 (95% CI 117.1, 146.1); visual impairment OR=65.9 (95% CI 58.7, 73.9); hearing impairment OR=22.0 (95% CI 19.2, 25.2); physical disability OR=157.5 (95% CI 144.6, 171.7). These ratios are also greater than previously reported for people with *either* intellectual disabilities *or* autism (rather than co-occurring intellectual disabilities and autism)

**Conclusions:** We have quantified the more than double disadvantage for people with co-occurring intellectual disabilities and autism, in terms of additional mental health conditions and impairments. This may well impact on quality of life. It raises challenges for staff working with these people in view of

1  
2  
3 additional complexity in assessments, diagnoses, and interventions of  
4 additional health conditions, as sensory impairments and mental health  
5 conditions in particular, compound with the persons pre-existing  
6 communication and cognitive problems in this context. Planning is important,  
7 with staff being trained, equipped, resourced and prepared to address the  
8 challenge of working for people with these conditions.  
9  
10  
11  
12  
13  
14  
15  
16  
17

18 **Keywords:** Intellectual disabilities, autism, mental health conditions, sensory  
19 impairments, vision, hearing, physical disability, co-morbidity.  
20  
21  
22  
23  
24

### 25 **Strengths and limitations of this study**

26  
27  
28

- 29 • Large scale, whole country cross-sectional study, with a high response rate  
30 (94%), so the results are representative of the whole population.  
31
- 32 • Intellectual disabilities, autism, and additional long-term conditions were  
33 enquired about systematically for everyone in the population.  
34
- 35 • The wording of questions was tested in advance, via cognitive question  
36 testing during the design of Scotland's Census, 2011.  
37
- 38 • Limitations include proxy-reporting.  
39
- 40 • People known to have autism/Asperger's syndrome, intellectual disabilities,  
41 and the four long-term conditions were reported, rather than each  
42 undergoing detailed individual research assessments which are not possible  
43 in such large population studies.  
44  
45  
46  
47  
48  
49  
50  
51  
52  
53  
54  
55  
56  
57  
58  
59  
60

## Background

People with intellectual disabilities have more mental and physical health needs than other people.<sup>1-4</sup> People with autism also appear to have more mental and physical health needs than other people.<sup>5-8</sup> A whole population study of Scotland reported that 21.7% of people with intellectual disabilities also had autism, and 18.0% of people with autism also had intellectual disabilities,<sup>9</sup> so this dually diagnosed group warrant investigation. One would suspect that this population with co-occurring intellectual disabilities and autism (both conditions together) are likely to have a high level of additional health needs, but this has received little previous study. A higher number of additional health needs increases the likelihood of misdiagnosis, and treatment interactions, so requires more complex treatment plans. Hence it is important to investigate long-term additional health needs experienced by people with co-occurring intellectual disabilities and autism.

Some studies have investigated mental ill-health in people with co-occurring intellectual disabilities and autism. A small study of 149 adults with severe or profound intellectual disabilities and autism, living in state-run developmental centres in Louisiana, USA, compared comorbidity with 158 adults with intellectual disabilities without autism in the same centres. The former group had more symptomology for anxiety, mania, schizophrenia, stereotypies, self-injurious behaviour, eating disorders, sexual disorders, and impulse control.<sup>10</sup> A study in Norway compared 62 adults with co-occurring autism and intellectual disabilities under the care of autism services, with 132 adults with intellectual disabilities only receiving intellectual disabilities support.<sup>11</sup> High levels of psychiatric disorders were reported in both groups; 53.2% in the co-occurring

1  
2  
3 intellectual disabilities and autism group, and 17.4% in the intellectual  
4 disabilities only group. An English study of referrals to a specialist intellectual  
5 disabilities psychiatric service described 42% of the 137 referred adults who  
6 had autism as well as intellectual disabilities to have comorbid  
7 psychopathology, most commonly schizophrenia.<sup>12</sup> A study of youth aged 14-  
8 20 years age, gender matched 36 people with co-occurring intellectual  
9 disabilities and autism with 36 people with intellectual disabilities without  
10 autism.<sup>13</sup> They reported the former group to have more episodes of mental ill-  
11 health, most commonly depression. A study of Medicaid claims data 2012-  
12 2015 in Wisconsin, USA compared adults aged 40+years; 64 with autism and  
13 intellectual disabilities and 79 with autism but no intellectual disabilities.<sup>8</sup> They  
14 reported no statistical difference between the two groups for claims for  
15 psychiatric disorders. Claim rates were high over all (67.2% for those who  
16 additionally had intellectual disabilities, and 75.9% for those who did not).<sup>8</sup> The  
17 authors state the autism only sample was probably skewed towards the lower  
18 end of socioeconomic status of all people with autism.<sup>8</sup> A study of people aged  
19 8-29 years with intellectual disabilities and challenging behaviour living in four  
20 residential units in England included 69 who also had autism and 13 who did  
21 not.<sup>14</sup> They reported a higher prevalence of organic disorders, anxiety and  
22 stereotypies in the young people with co-occurring intellectual disabilities and  
23 autism. This literature is difficult to summarise overall, as, as well as having  
24 small sample sizes, the participants were not drawn from representative  
25 populations.

26  
27  
28  
29  
30  
31  
32  
33  
34  
35  
36  
37  
38  
39  
40  
41  
42  
43  
44  
45  
46  
47  
48  
49  
50  
51  
52  
53  
54 A further study had the advantage of being population-based, but was still  
55 small in size.<sup>15</sup> It compared the prevalence, and incidence, of mental ill-health  
56 in 77 adults with co-occurring intellectual disabilities and autism with 946  
57  
58  
59  
60

1  
2  
3 adults with intellectual disabilities without autism, and also with 154  
4  
5 individually age, gender, ability-level, and Down syndrome matched controls.  
6  
7 The adults with autism had a higher point prevalence of problem behaviours  
8  
9 than the 946 without autism, but compared with the 154 matched controls  
10  
11 there was no difference in prevalence, or incidence of either problem  
12  
13 behaviours or other mental ill-health.<sup>15</sup> Three large whole population studies  
14  
15 have reported that of people with intellectual disabilities, 21.7% reported  
16  
17 mental health conditions;<sup>3</sup> and of people with autism, 33.0% of adults,<sup>6</sup> and  
18  
19 7.6% of children<sup>7</sup> reported mental health conditions, but did not report the  
20  
21 rates for people with co-occurring intellectual disabilities and autism.  
22  
23  
24  
25

26  
27 With regards to sensory impairments, of the 36 matched youth with  
28  
29 intellectual disabilities with and without autism, 38.9% with autism reported  
30  
31 having visual problems compared with 50.0% without autism, and 13.9% with  
32  
33 autism reported having hearing problems compared with 19.4% without  
34  
35 autism.<sup>13</sup> An intellectual disabilities register study reported that 95 of the 368  
36  
37 (25.8%) adults with intellectual disabilities who had visual impairment also had  
38  
39 markers for autism, compared with 422 of 2,674 (16%) of those who had  
40  
41 normal vision, and that 46 of the 60 (76.7%) of the adults with intellectual  
42  
43 disabilities and congenital blindness also had markers for autism, compared  
44  
45 with only 36 of the 67 (53.7%) with normal vision.<sup>16</sup>  
46  
47  
48  
49

50  
51 We have not identified other papers on sensory impairments or any on  
52  
53 physical disabilities in people with co-occurring intellectual disabilities and  
54  
55 autism. However, previous large whole population studies have reported that  
56  
57 of people with intellectual disabilities, 12.4% reported blindness/sight loss,  
58  
59 13.1% reported deafness/hearing loss, and 32.6% reported physical disability.<sup>3</sup>  
60

1  
2  
3 Of people with autism, 12.1% of adults<sup>6</sup> and 3.5% of children reported  
4 blindness/sight loss,<sup>7</sup> 14.1% of adults<sup>6</sup> and 2.9% of children reported  
5 deafness/hearing loss,<sup>7</sup> and 24.0% of adults<sup>6</sup> and 10.7% of children reported  
6 physical disability.<sup>7</sup> They did not, however, report the rates of these conditions  
7 for people with co-occurring intellectual disabilities and autism.  
8  
9  
10  
11  
12  
13  
14  
15

16 Given the frequent overlap of intellectual disabilities and autism, information  
17 on the associated comorbid conditions is important, to assist policy makers,  
18 planners, and practitioners to best adapt services for individuals with co-  
19 occurring intellectual disabilities and autism. This paper aims to investigate the  
20 prevalence of mental health conditions, sensory impairments, and physical  
21 disability in children, adults, and older adults with co-occurring intellectual  
22 disabilities and autism, compared with other people.  
23  
24  
25  
26  
27  
28  
29  
30  
31  
32

## 33 **Methods**

### 34 **Approval**

35 Approval was obtained from the Scottish Government to undertake secondary  
36 data analysis of Scotland's Census, 2011.  
37  
38  
39

### 40 **Data Source**

41 Scotland's Census provides information on Scotland's population every ten  
42 years, with the most recent Census on 27<sup>th</sup> March 2011.<sup>17</sup> The Census provides  
43 information on the number and characteristics of Scotland's population and  
44 households on the Census date.  
45  
46  
47  
48  
49  
50  
51  
52  
53  
54  
55  
56  
57  
58  
59  
60

1  
2  
3 It is a legal requirement to complete the census form and households were  
4 informed that failure to make a Census return, or supplying false information  
5 could result in a £1,000 fine. A very high response rate was achieved, with an  
6 estimated 94% of all of Scotland's population completing the Census. The  
7 Census team used a Census Coverage Survey with about 40,000 households, to  
8 estimate numbers and characteristics of the missing 6%.<sup>18</sup> The Coverage Survey  
9 and Census records were deterministically matched to check for duplicates.  
10 Individuals estimated to have been missed were then imputed using a subset  
11 of characteristics from real individuals. The edit and imputation methodology  
12 was adapted from the Office for National Statistics rigorous and systematic  
13 guidelines.<sup>18</sup>  
14  
15  
16  
17  
18  
19  
20  
21  
22  
23  
24  
25  
26  
27  
28

29 The Census was completed by the head of each household on behalf of all  
30 occupants of the household. We consider it unlikely that people with co-  
31 occurring intellectual disabilities and autism completed the form, given the  
32 reading age required to do so. Rather, we expect that the people who  
33 completed the form on their behalf were parent-carers in family households,  
34 support workers for people living in supported accommodation, and the  
35 managers/key workers at communal establishments.  
36  
37  
38  
39  
40  
41  
42  
43  
44  
45

## 46 **Variables**

47  
48 The census included a question to identify people with intellectual disabilities  
49 and autism, as well as mental health conditions, sensory impairments, and  
50 physical disabilities: 'Do you have any of the following conditions which have  
51 lasted, or are expected to last, at least 12 months? Tick all that apply'. There  
52 was a choice of ten possible responses to this question: deafness or partial  
53 hearing loss; blindness or partial sight loss; learning disability (for example,  
54  
55  
56  
57  
58  
59  
60



1  
2  
3 Down's syndrome); learning difficulty (for example, dyslexia); developmental  
4 disorder (for example, Autistic Spectrum Disorder or Asperger's Syndrome);  
5  
6 physical disability; mental health condition; long-term illness, disease or  
7  
8 condition; other condition. For "other condition" the option of providing more  
9  
10 detail in an open text response was provided.  
11  
12  
13  
14  
15

16 In Scotland, the term "learning disability" is used synonymously with that of  
17  
18 "intellectual disabilities" used internationally. Importantly, the Census  
19  
20 differentiated between intellectual disabilities and specific learning disabilities;  
21  
22 and between intellectual disabilities and autism.  
23  
24  
25  
26

27 During the methodology development for Scotland's Census, 2011, cognitive  
28  
29 question testing was undertaken on the questions on long-term health  
30  
31 conditions and disabilities. This was to determine whether the questions were  
32  
33 answered accurately, and to identify any changes needed to improve data  
34  
35 quality and/or the acceptability of the way questions were phrased. Cognitive  
36  
37 interviewing is a widely used approach to critically evaluate and improve  
38  
39 survey questionnaires.<sup>19</sup> This approach enables researchers to modify survey  
40  
41 material to enhance clarity. Retrospective probing was conducted with 102  
42  
43 participants with a variety of sex, age, and health conditions and disabilities  
44  
45 (including people with more than one of the conditions). They included people  
46  
47 with autism, intellectual disabilities, dyslexia, dyspraxia, speech impairment,  
48  
49 mental health conditions (both milder and more serious), and other long-term  
50  
51 conditions.<sup>20</sup> Using the cognitive interviewing results, the question aimed to  
52  
53 detect autism was improved and rephrased, to better capture this information.  
54  
55  
56 The questions on intellectual disability, mental health condition, visual  
57  
58  
59  
60

1  
2  
3 impairment, hearing impairment, and physical disability did not require any  
4  
5 modifications.  
6  
7  
8  
9

10 The Census team imputed answers for the 14.7% who did not tick any of the  
11 boxes in question on long-term conditions, based on their free text answers for  
12 this question and answers to other health questions in the Census, which  
13 increased the completion rate to 97.4%. For the remaining 2.6%, the Census  
14 team assumed the most plausible explanation was that the person had no  
15 long-term condition but did not see the “No condition” check box at the end of  
16 the question, and hence recorded them as having no conditions.  
17  
18  
19  
20  
21  
22  
23  
24  
25  
26

### 27 **Procedure**

28  
29 Data was downloaded from the National Records of Scotland Census data  
30 archive.  
31  
32  
33  
34  
35

### 36 **Data Analysis**

37 We calculated the number and rate per 1,000 population of children and  
38 adults with co-occurring intellectual disabilities and autism. We then calculated  
39 the number and percentage of people with mental health conditions, deafness  
40 or partial hearing loss, blindness or partial sight loss, and physical disability, for  
41 those with co-occurring intellectual disabilities and autism, compared with  
42 individuals who do not have co-occurring intellectual disabilities and autism  
43 using chi-squared ( $\chi^2$ ) tests. For the whole population we then used logistic  
44 regression to calculate the odds ratios (OR: 95% confidence interval, 95% CI) to  
45 estimate the effect size of the primary interest, co-occurring intellectual  
46 disabilities and autism, on the binary response of having each of the four  
47 specific types of long-term health conditions, adjusted for age and sex. Sex was  
48  
49  
50  
51  
52  
53  
54  
55  
56  
57  
58  
59  
60

1  
2  
3 binary, with male as the reference group. Age was categorised into groups: 0-  
4 15, 16-24, 25-34, 35-44, 45-54, 55-64, 65-74, 75+, with 0-15 years as the  
5 reference group. We repeated the regressions, including the interaction term  
6 of age x co-occurring intellectual disabilities and autism, as people with the  
7 most severe disabilities die earlier, which may affect the profile of additional  
8 health problems differently to that seen in the general population. The same  
9 reference groups were used. All analysis was conducted using SPSS software  
10 version 22.  
11  
12  
13  
14  
15  
16  
17  
18  
19  
20  
21  
22

### 23 **Patient and public involvement**

24 The Scottish Learning Disabilities Observatory, where this research was  
25 undertaken, has a specific remit for people with intellectual disabilities and  
26 people with autism. Its steering group includes partners from third sector  
27 organisations and experts by experience, who approved the workplan for this  
28 project prior to it commencing. Results from this study will be disseminated for  
29 people with intellectual disabilities and autism in an easy-read version via the  
30 Scottish Learning Disabilities Observatory website, newsletters, and  
31 conference.  
32  
33  
34  
35  
36  
37  
38  
39  
40  
41  
42  
43

## 44 **Results**

### 45 **Characteristics of the Sample**

46 Scotland's Census, 2011, includes records on 5,295,403 people aged 0-75+  
47 years. 5,709/5,295,403 (1.08/1,000) people had co-occurring intellectual  
48 disabilities and autism; of whom 3,769 (66.0%) were male and 1,940 (44.0%)  
49 were female. Overall, 2,362/916,331 (2.58/1,000) of the total population of  
50  
51  
52  
53  
54  
55  
56  
57  
58  
59  
60

1  
2  
3 children (0-15 years), and 3,347/4,379,072 (0.76/1,000) adults (16-75+ years)  
4 had co-occurring intellectual disabilities and autism.  
5  
6  
7  
8  
9

10 Compared with the population who did not have co-occurring intellectual  
11 disabilities and autism, the population with co-occurring intellectual disabilities  
12 and autism had more males (66.0% versus 48.5%;  $\chi^2=703.5$ ;  $df=1$ ;  $p<0.001$ );  
13 were younger ( $\chi^2=3894.7$ ;  $df=7$ ;  $p<0.001$ ); were more likely to have been born  
14 in the UK rather than elsewhere ( $\chi^2=101.9$ ;  $df=1$ ;  $p<0.001$ ), revealing lesser  
15 geographic mobility; and were no different with regards to Caucasian versus  
16 non-Caucasian ethnicity ( $\chi^2=1.1$ ;  $df=1$ ;  $p=0.3$ ) (table 1).  
17  
18  
19  
20  
21  
22  
23  
24  
25  
26

27 - Insert table 1 about here -  
28  
29  
30

### 31 **Long-term Health Conditions**

32 Table 2 shows the proportion of people with co-occurring intellectual  
33 disabilities and autism, who had each of the four additional long-term health  
34 conditions, compared to people who did not have co-occurring intellectual  
35 disabilities and autism. Some people in the sample had more than one long-  
36 term health condition.  
37  
38  
39  
40  
41  
42  
43  
44  
45  
46

47 - Insert table 2 about here -  
48  
49  
50

### 51 *Mental Health Condition*

52 Adjusting for age and sex, given the different distributions compared with the  
53 general population, having co-occurring intellectual disabilities and autism had  
54 an OR=25.553 (23.933-27.282, 95% CI) for mental health conditions (table 3).  
55  
56  
57  
58  
59  
60 When the interaction term was added (age x co-occurring intellectual

1  
2  
3 disabilities and autism), co-occurring intellectual disabilities and autism had an  
4 OR=130.803 (117.131-146.07048.8, 95% CI) for a mental health condition  
5  
6 (table 3).  
7  
8  
9

10  
11  
12 - Insert table 3 about here -  
13  
14

### 15 16 *Blindness or partial sight loss*

17  
18 Adjusting for age and sex, having co-occurring intellectual disabilities and  
19 autism had an OR=36.781 (34.212-39.542, 95% CI) for blindness or partial sight  
20 loss (table 4). When the interaction term was added (age x co-occurring  
21 intellectual disabilities and autism), co-occurring intellectual disabilities and  
22 autism had an OR=65.897 (58.743-73.922, 95% CI) for blindness or partial sight  
23 loss (table 4).  
24  
25  
26  
27  
28  
29  
30  
31  
32

33 - Insert table 4 about here -  
34  
35

### 36 37 *Deafness or partial hearing loss*

38  
39 Adjusting for age and sex, having co-occurring intellectual disabilities and  
40 autism had an OR=11.331 (10.430-12.309, 95% CI) for deafness or partial  
41 hearing loss (table 5). When the interaction term was added (age x co-  
42 occurring intellectual disabilities and autism), co-occurring intellectual  
43 disabilities and autism had an OR=21.996 (19.196-25.205, 95% CI) for deafness  
44 or partial hearing loss (table 5).  
45  
46  
47  
48  
49  
50  
51  
52

53  
54 - Insert table 5 about here -  
55  
56

### 57 58 *Physical disability* 59 60

1  
2  
3 Adjusting for age and sex, having co-occurring intellectual disabilities and  
4 autism had an OR=61.159 (57.601-64.938, 95% CI) for physical disability (table  
5 6). When the interaction term was added (age x co-occurring intellectual  
6 7 disabilities and autism), co-occurring intellectual disabilities and autism had an  
7 8 OR=157.535 (144.577-171.655, 95% CI) for physical disability (table 6).  
9  
10  
11  
12  
13  
14  
15

16 - Insert table 6 about here –  
17  
18  
19

### 20 *Prevalence differences*

21  
22 Prevalence differences are apparent from table 2. For children and young  
23 people aged 0-15 years, the difference in prevalence between the population  
24 with co-occurring intellectual disabilities and autism, and the rest of the general  
25 population, was: 20.0/100 for mental health conditions, 16.2/100 for  
26 blindness/partial sight loss, 9.8/100 for deafness/partial hearing loss, and  
27 44.9/100 for physical disability. For adults aged 16-64 years, the difference in  
28 prevalence between the population with co-occurring intellectual disabilities  
29 and autism, and the rest of the general population, was: 31.5/100 for mental  
30 health conditions, 17.3/100 for blindness/partial sight loss, 12.4/100 for  
31 deafness/partial hearing loss, and 34.8/100 for physical disability. For older  
32 adults aged 65+ years, the difference in prevalence between the population  
33 with co-occurring intellectual disabilities and autism, and the rest of the general  
34 population, was: 61.0/100 for mental health conditions, 52.9/100 for  
35 blindness/partial sight loss, 37.7/100 for deafness/partial hearing loss, and  
36 55.3/100 for physical disability.  
37  
38  
39  
40  
41  
42  
43  
44  
45  
46  
47  
48  
49  
50  
51  
52  
53  
54  
55

## 56 **Discussion**

57  
58  
59  
60

## Principle findings

Mental health conditions, blindness or partial sight loss, deafness or partial hearing loss, and physical disability were all significantly more common in people with co-occurring intellectual disabilities and autism than people without these co-occurring conditions. The odds ratios after adjusting for age and sex and the interaction term, were substantial, being 131, 66, 22, and 158 respectively. This is important as each of these conditions are disabling and can significantly impact an individual's quality of life. They contribute to high rates of multi-morbidity, which, on top of communication and cognitive problems due to autism and intellectual disabilities, renders assessments, diagnosis, and treatment of additional health problems more complex than for other people.

Across all age groups, blindness, deafness, and physical disability were more common in females than males with co-occurring intellectual disabilities and autism, unlike the sex ratios in people without co-occurring intellectual disabilities and autism. Mental health conditions were more common in males than females with co-occurring intellectual disabilities and autism, except for the 65+ year group, contrary to the gender ratios in other people. All conditions were more prevalent with increasing age in the people with co-occurring intellectual disabilities and autism, except for physical disability which was more common in the children/youth and older people than in the adults.

There are likely to be many biological, social, and environmental reasons accounting for these results.

## Comparison with existing literature

1  
2  
3 The prevalence of these additional long-term health conditions has seldom  
4 been investigated in people with co-occurring intellectual disabilities and  
5 autism, particularly in comparison with other people, and never, to our  
6 knowledge, as a total population study. While prevalence rates of mental  
7 health conditions and impairments in a full country population for individuals  
8 with intellectual disabilities, and separately for individuals with autism have  
9 been compared to the general population, no such study has been conducted  
10 on the prevalence of mental health conditions and impairments for those with  
11 co-occurring intellectual disabilities and autism. We found all of the long-term  
12 health conditions were more common than in those without co-occurring  
13 intellectual disabilities and autism.  
14  
15  
16  
17  
18  
19  
20  
21  
22  
23  
24  
25  
26  
27  
28

29 Smaller, less representative studies have reported a higher rate of mental  
30 health conditions in adults and youth with co-occurring intellectual disabilities  
31 and autism compared with those with intellectual disabilities and without  
32 autism,<sup>9-14</sup> but not all.<sup>15</sup> People with autism have been reported to have more  
33 mental health conditions than other people (OR=9 in adults and OR=16 in  
34 children),<sup>6,7</sup> as have people with intellectual disabilities compared with other  
35 people (OR=7),<sup>3</sup> using the same Scotland's Census, 2011 data as in this current  
36 paper, whereas the comparable ratio we now report for people with co-  
37 occurring intellectual disabilities and autism for mental health conditions was  
38 OR=26. Having the co-occurring conditions therefore presents a much higher  
39 risk of mental health conditions than either intellectual disabilities or autism  
40 on their own.  
41  
42  
43  
44  
45  
46  
47  
48  
49  
50  
51  
52  
53  
54  
55  
56

57 The previous small study of youth reported lower rates of visual and hearing  
58 impairments in those with co-occurring intellectual disabilities and autism  
59  
60



1  
2  
3 (38.9% and 13.9%) compared with those with intellectual disabilities but  
4 without autism (50% and 19.4%).<sup>13</sup> This was in contrast with the larger study  
5 reporting more autistic symptoms in adults with intellectual disabilities and  
6 visual impairments than in adults with intellectual disabilities but without  
7 visual impairments.<sup>16</sup> Adults with autism have been reported to have more  
8 blindness or partial sight loss, and deafness or partial hearing loss than other  
9 people (12.1% and 17.5%),<sup>6</sup> as have children with autism (3.5% and 2.9%),<sup>7</sup> and  
10 people (children and adults combined) with intellectual disabilities compared  
11 with other people (13.1% and 12.4%),<sup>3</sup> using the same Scotland's Census 2011  
12 as in this current paper. This current study found the comparable rates for  
13 people with co-occurring intellectual disabilities and autism for blindness or  
14 partial sight loss, and deafness or partial hearing loss was 21.7% and 19.3% for  
15 adults, and 16.6% and 10.3% for children. Having the co-occurring conditions  
16 of intellectual disabilities and autism therefore presents a much higher risk of  
17 sensory impairments than for children and adults with autism, and for people  
18 with intellectual disabilities (although children were not separately studied in  
19 the previous report).

20  
21  
22  
23  
24  
25  
26  
27  
28  
29  
30  
31  
32  
33  
34  
35  
36  
37  
38  
39  
40  
41 Regarding physical disability, 32.6% of people with intellectual disabilities were  
42 previously reported to have physical disability.<sup>3</sup> Of people with autism, 24.0%  
43 of adults and 10.7% of children reported physical disability.<sup>6,7</sup> These rates are  
44 lower than those we report in this current study of people with co-occurring  
45 intellectual disabilities and autism – 45.6% of children and 42.2% of adults.  
46 Cerebral palsy is associated with intellectual disabilities, but the extent of this  
47 association does not appear to account for the differences found in physical  
48 disability: cerebral palsy has been reported to occur in 13% of children and  
49  
50  
51  
52  
53  
54  
55  
56  
57  
58  
59  
60

1  
2  
3 young people with intellectual disabilities,<sup>21</sup> and in 3.2% of general population  
4 children and young people in the USA.<sup>22</sup>  
5  
6  
7  
8  
9

### 10 **Strengths and limitations**

11 Strengths of the study include its large scale and general population  
12 comparison group, whole population coverage, and very high response rate so  
13 the results are representative of the whole population. Intellectual disabilities,  
14 autism, and the long-term health conditions were enquired about  
15 systematically for everyone in the population. We believe the results are  
16 therefore generalisable to other high-income countries. The cognitive question  
17 testing during the design of the Census is a further strength. The Census had  
18 clear categories to distinguish between intellectual disabilities, specific learning  
19 disability (like dyslexia), and autism.  
20  
21  
22  
23  
24  
25  
26  
27  
28  
29  
30  
31  
32

33 Limitations include the proxy-reporting, which may, or may not reflect self-  
34 reports. Without proxy-reports, we would have no information on people  
35 unable to self-report due to their disabilities, and a previous review on the  
36 topic concluded that overall, proxy reports are a useful addition to determine  
37 aspects of well-being in people with intellectual disabilities.<sup>23</sup> Additionally,  
38 people were reported who were known to have autism/Asperger's syndrome,  
39 intellectual disabilities, and the additional long-term health conditions, rather  
40 than detailed individual research assessments being undertaken which are  
41 clearly not possible in such large population studies, and may therefore be  
42 subject to a degree of error which we were not able to check.  
43  
44  
45  
46  
47  
48  
49  
50  
51  
52  
53  
54  
55

56 Scotland's Census 2011 was administered 8 years ago, and so any potential  
57 changes in prevalence of conditions since then are not captured by our  
58  
59  
60

1  
2  
3 analyses. People with intellectual disabilities and autism are both higher health  
4 care users than other people and so may receive more diagnoses, but they are  
5 also subject to “diagnostic overshadowing”. We do not know the extent to  
6 which these factors may impact on reporting of mental health conditions,  
7 sensory impairments, and physical disability at Scotland’s Census, 2011.  
8 However, given the long-term nature of these conditions, any impact is likely  
9 to be less than it would be for acute conditions.”  
10  
11  
12  
13  
14  
15  
16  
17  
18  
19

20 The study is cross-sectional, rather than longitudinal. We acknowledge that the  
21 use of odds ratios may overestimate the strength of associations in cross-  
22 sectional studies where the prevalence in the general population is very low;  
23 calculating odds ratios has enabled us to draw comparisons with previously  
24 published results on mental health conditions and impairments of people with  
25 intellectual disabilities, and of people with autism. We also present example  
26 prevalence differences. It is also important to note that whilst our regressions  
27 adjusted for sex and age, the effect sizes for sex and age shown in tables 3-6  
28 might not be the total effect of sex and age on the four outcomes: they show  
29 the proportion of the sex, age effect on the odds ratio for the four outcomes  
30 that are not mediated through any sex, age effect on co-occurring intellectual  
31 disabilities and autism.<sup>24</sup> Hence in our discussions of sex and age, we referred  
32 to prevalence rather than odds ratios.  
33  
34  
35  
36  
37  
38  
39  
40  
41  
42  
43  
44  
45  
46  
47  
48  
49

## 50 **Implications**

51 Management of individuals with multiple health conditions or disabilities  
52 presents significant challenges for health care practitioners. A review of 123  
53 studies on care management for individuals with multiple chronic conditions in  
54 the USA reported that these patients access services more frequently and use  
55  
56  
57  
58  
59  
60

1  
2  
3 a larger range of services than other patients, making the coordination of their  
4 care more difficult and often leading to suboptimal care.<sup>25</sup> Evidence from the  
5 UK suggests that individuals with intellectual disabilities and additional long  
6 term conditions receive poorer management than members of the general  
7 population with the same conditions.<sup>26</sup>  
8  
9  
10  
11  
12  
13  
14  
15

16 We have shown there is a greater than double disadvantage for people with  
17 co-occurring intellectual disabilities and autism, in terms of additional long-  
18 term health conditions. We found that, and quantified, mental health  
19 conditions, sensory impairments, and physical disabilities are more common  
20 than people without co-occurring intellectual disabilities and autism, and in  
21 people with just intellectual disabilities or just autism. This may well impact on  
22 quality of life. It raises challenges for staff working with people with these co-  
23 occurring conditions in view of the additional complexity in assessments,  
24 diagnoses, and interventions, as sensory impairments and mental health  
25 conditions in particular, interact with the persons pre-existing communication  
26 and cognitive problems in this context. Therefore, it is important that these co-  
27 occurring conditions are planned for with staff being trained, equipped,  
28 resourced and prepared to address the challenge. At present, Government  
29 policy and strategy in Scotland addresses needs of people with intellectual  
30 disabilities,<sup>27</sup> and autistic people,<sup>28</sup> but has not yet established a framework for  
31 people with these co-occurring conditions; our findings are therefore highly  
32 relevant.  
33  
34  
35  
36  
37  
38  
39  
40  
41  
42  
43  
44  
45  
46  
47  
48  
49  
50  
51

## 52 53 54 **References** 55 56 57 58 59 60

- 1  
2  
3  
4  
5  
6  
7  
8  
9  
10  
11  
12  
13  
14  
15  
16  
17  
18  
19  
20  
21  
22  
23  
24  
25  
26  
27  
28  
29  
30  
31  
32  
33  
34  
35  
36  
37  
38  
39  
40  
41  
42  
43  
44  
45  
46  
47  
48  
49  
50  
51  
52  
53  
54  
55  
56  
57  
58  
59  
60
1. Cooper S-A, McLean G, Guthrie B, McConnachie A, Mercer S, Sullivan F, Morrison J. Multiple physical and mental health comorbidity in adults with intellectual disabilities: population-based cross-sectional analysis. *BMC Family Practice* 2015; 16: 110.
2. Hughes-McCormack LA, Rydzewska E, Henderson A., Rintoul J, Macintyre C, Cooper S-A. Prevalence and general health status of people with intellectual disabilities in Scotland -a total population study. *J Epidemiol Community Health* 2018; 72: 78–85.
3. Hughes-McCormack LA, Rydzewska E, Henderson A, Rintoul J, Macintyre C, Cooper S-A. Prevalence of mental ill-health and relationship with physical health in a whole country population of 26,349 people with intellectual disabilities, compared with the general population. *Br J Psychiatry Open*, 2017; 3: 243-248.
4. Kinnear D, Morrison J, Allan L, Henderson A, Smiley E, & Cooper S-A. Prevalence of physical conditions and multimorbidity in a cohort of adults with intellectual disabilities with and without Down syndrome: cross-sectional study. *BMJ Open* 2018; 8:e018292.
5. Croen LA, Zerbo O, Qian Y, Massolo ML, Rich S, Sidney S, Kripke C. The health status of adults on the autism spectrum. *Autism* 2015; 19:814–823.
6. Rydzewska E, Hughes-McCormack LA, Gillberg C, Henderson A, MacIntyre C, Rintoul J, & Cooper S-A. Prevalence of long-term health conditions in adults with autism: observational study of a whole country population. *BMJ Open* 2018a; 8(8): e023945.
7. Rydzewska E, Hughes-McCormack LA, Gillberg C, Henderson A, MacIntyre C, Rintoul J, Cooper S-A. Prevalence of sensory impairments, physical and intellectual disabilities, and mental health in children and young people

- 1  
2  
3 with self/proxy-reported autism - observational study of a whole country  
4 population. *Autism* 2018; 23:1201-9.  
5  
6  
7  
8 8. Bishop-Fitzpatrick L, Rubenstein E. The physical and mental health of  
9 middle aged and older adults on the autism spectrum and the impact of  
10 intellectual disability. *Res Autism Spectrum Dis* 2019; 63:34-41.  
11  
12  
13  
14 9. Dunn K, Rydzewska E, Macintyre C, Rintoul J, & Cooper S-A. The  
15 prevalence and general health status of people with intellectual disabilities  
16 and autism co-occurring together: a total population study. *J Intellectual*  
17 *Disabilit Res* 2018, 63: 277-285.  
18  
19  
20  
21  
22 10. Cervantes PE, Matson JL. Comorbid symptomology in adults with autism  
23 spectrum disorder and intellectual disability. *J Autism Dev Disord* 2015;  
24 *45(12)*: 3961-3970.  
25  
26  
27  
28 11. Bakken TL, Helverschou SB, Eilertsen DE, Heggelund T, Myrbakk E, &  
29 Martinsen, H. Psychiatric disorders in adolescents and adults with autism  
30 and intellectual disability: A representative study in one county in Norway.  
31 *Res Dev Disabil* 2010; *31*: 1669-1677.  
32  
33  
34  
35  
36  
37 12. Tsakanikos E, Sturmey P, Costello H, Holt G, Bouras N. Referral trends in  
38 mental health services for adults with intellectual disability and autism  
39 spectrum disorders. *Autism* 2007; *11*:9-17.  
40  
41  
42  
43  
44 13. Bradley E, Bolton P. Episodic psychiatric disorders in teenagers with  
45 learning disabilities with and without autism. *Br J Psychiatr* 2006; *189*:361-  
46  
47  
48 6.  
49  
50  
51 14. Hill J, Furniss F. Patterns of emotional and behavioural disturbance  
52 associated with autistic traits in young people with severe intellectual  
53 disabilities and challenging behaviours. *Res Dev Disabil* 2006; *27*:517-28.  
54  
55  
56  
57 15. Melville CA, Cooper S-A, Morrison J, Smiley E, Allan L, Jackson A, Finlayson  
58 J, Mantry D. The prevalence and incidence of mental ill-health in adults  
59  
60

- 1  
2  
3 with autism and intellectual disabilities. *J Autism Dev Disord* 2008;  
4 38:1676-88.  
5  
6  
7  
8 16. Kiani, R, Bhaumik, S, Tyrer, F, Bankart, J, Miller, H, Cooper, S-A, Brugha, T.  
9 The relationship between autism spectrum disorder and visual  
10 impairments among adults with intellectual disability. *Autism Res* 2019;  
11 12:1411-1422.  
12  
13  
14  
15  
16 17. National Records of Scotland. Scotland's Census, 2011. Supporting  
17 information. *National Records of Scotland*. 2011  
18 <http://www.scotlandscensus.gov.uk/supporting-information>.  
19  
20  
21  
22 18. Office for National Statistics. Survey Methodology Bulletin No. 69 –  
23 September 2011. 2011 [https://](https://webarchive.nationalarchives.gov.uk/20160108193745/http://www.ons.gov.uk/guide-method/method-quality/survey-methodologybulletin/smb-69/index.html)  
24 [webarchive.nationalarchives.gov.uk/20160108193745/http://www.](https://webarchive.nationalarchives.gov.uk/20160108193745/http://www.ons.gov.uk/guide-method/method-quality/survey-methodologybulletin/smb-69/index.html)  
25 [ons.gov.uk/guide-method/method-quality/survey-](https://webarchive.nationalarchives.gov.uk/20160108193745/http://www.ons.gov.uk/guide-method/method-quality/survey-methodologybulletin/smb-69/index.html)  
26 [methodologybulletin/smb-69/index.html](https://webarchive.nationalarchives.gov.uk/20160108193745/http://www.ons.gov.uk/guide-method/method-quality/survey-methodologybulletin/smb-69/index.html).  
27  
28  
29  
30  
31  
32  
33 19. Willis GB. Cognitive interviewing: A tool for improving questionnaire design.  
34 Sage Publications; 2004.  
35  
36  
37 20. General Register Office for Scotland. 2011 Census Question Testing- The  
38 Health and Disability Questions (2009). 2009  
39 [https://www.scotlandscensus.gov.uk/documents/research/2011-census-](https://www.scotlandscensus.gov.uk/documents/research/2011-census-healthdisability-questions.pdf)  
40 [healthdisability-questions.pdf](https://www.scotlandscensus.gov.uk/documents/research/2011-census-healthdisability-questions.pdf).  
41  
42  
43  
44  
45  
46 21. Van Naarden Braun K, Christensen D, Doernberg N, Schieve L, Rice C,  
47 Wiggins L, Schendel , Yeargin-Allsopp M Trends in the prevalence of  
48 autism spectrum disorder, cerebral palsy, hearing loss, intellectual  
49 disability, and vision impairment, metropolitan Atlanta, 1999-2010.  
50 *PLOS One* <https://doi.org/10.1371/journal.pone.0124120>  
51  
52  
53  
54  
55  
56  
57 22. McGuire DO, Tian LH, Yeargin-Allsop M, Dowling NF, Christensen DL.  
58 Prevalence of cerebral palsy, intellectual disability, hearing in loss, and  
59  
60

- 1  
2  
3 blindness, National Health Interview Survey, 2009-2016. *Disabil Health J*  
4 2019; 12:443-451.  
5  
6  
7  
8 23.Perkins EA, Berkman KA. Into the unknown: Aging with autism spectrum  
9 disorders. *Am J Intellect Dev Disabil* 2012; 117:478-96.  
10  
11  
12 24.Westreich D, Greenland, S. The table 2 fallacy: presenting and interpreting  
13 confounder and modifier coefficients. *Am J Epidemiology* 2013; 177:292-  
14 298.  
15  
16  
17  
18 25.Vogeli C, Shields AE, Lee TA, Gibson TB, Marder WD, Weiss KB, Blumenthal  
19 D. Multiple chronic conditions: prevalence, health consequences, and  
20 implications for quality, care management, and costs. *J Gen Internal Med*  
21 2007; 22(3):391-5.  
22  
23  
24  
25  
26  
27 26.Cooper S-A, Hughes-McCormack L, Greenlaw N, McConnachie A, Allan L,  
28 Baltzer M, McArthur L, Henderson A, Melville C, McSkimming P, Morrison  
29 J. Management and prevalence of long-term conditions in primary health  
30 care for adults with intellectual disabilities compared with the general  
31 population: A population-based cohort study. *J Applied Res Intellectual*  
32 *Disabil* 2018; 31:68-81.  
33  
34  
35  
36  
37  
38  
39  
40 27.Scottish Government. The keys to life: Unlocking futures for People with  
41 Learning Disabilities Implementation framework and priorities 2019-2021.  
42 2019; [https://keystolife.info/wp-content/uploads/2019/03/Keys-To-Life-](https://keystolife.info/wp-content/uploads/2019/03/Keys-To-Life-Implementation-Framework.pdf)  
43 [Implementation-Framework.pdf](https://keystolife.info/wp-content/uploads/2019/03/Keys-To-Life-Implementation-Framework.pdf)  
44  
45  
46  
47  
48 28.Scottish Government. Scottish Strategy for Autism: outcomes and  
49 priorities 2018-2021. 2018; [https://www.gov.scot/publications/scottish-](https://www.gov.scot/publications/scottish-strategy-autism-outcomes-priorities-2018-2021/)  
50 [strategy-autism-outcomes-priorities-2018-2021/](https://www.gov.scot/publications/scottish-strategy-autism-outcomes-priorities-2018-2021/)  
51  
52  
53  
54  
55  
56  
57  
58

## 59 Funding



1  
2  
3  
4  
5 This work was supported by the UK Medical Research Council, grant number:  
6 MC\_PC\_1717), and the Scottish Government via the Scottish Learning  
7  
8 Disabilities Observatory.  
9

10  
11  
12  
13 The study sponsor and funders had no role in the study design; in the  
14 collection, analysis, and interpretation of data; in the writing of the report; and  
15  
16 in the decision to submit the article for publication.  
17  
18

19  
20  
21  
22 The researchers are independent from the funders.  
23  
24

## 25 26 **Competing interests**

27  
28  
29  
30  
31 The authors declare no competing interests.  
32  
33

## 34 35 **Author's contributions**

36  
37  
38  
39  
40 KD analysed and interpreted the data, and wrote the first draft of the  
41 manuscript. ER contributed to data access, data interpretation, and drafting  
42 the manuscript. MF provided advice on response to reviewer comments  
43 regarding choice of statistical methods and contributed to the writing of the  
44 manuscript. S-AC conceived and managed the project, interpreted data, and  
45 contributed to writing the manuscript. All approved the final version of the  
46 manuscript. S-AC is the study guarantor.  
47  
48  
49  
50  
51  
52  
53

## 54 55 56 57 **Data sharing** 58 59 60

1  
2  
3 Data is available via National Records of Scotland, following project approval.  
4

5 Data are available at the following link  
6

7 [https://www.scotlandscensus.gov.uk/ods-web/data-](https://www.scotlandscensus.gov.uk/ods-web/data-warehouse.html#additionaltab)  
8  
9 [warehouse.html#additionaltab](https://www.scotlandscensus.gov.uk/ods-web/data-warehouse.html#additionaltab)  
10  
11  
12  
13  
14  
15

## 16 **Acknowledgments**

17  
18  
19  
20

21 We thank the National Records of Scotland Census team, and the Scottish  
22 population who completed the Census.  
23  
24  
25  
26  
27  
28  
29  
30  
31  
32  
33  
34  
35  
36  
37  
38  
39  
40  
41  
42  
43  
44  
45  
46  
47  
48  
49  
50  
51  
52  
53  
54  
55  
56  
57  
58  
59  
60

Table 1: Characteristics of people with and without, co-occurring intellectual disabilities and autism

|                                | <b>People without co-occurring intellectual disabilities and autism</b><br>N=5,289,694 (100%)<br>Number (%) | <b>People with co-occurring intellectual disabilities and autism</b><br>N=5,709 (100%)<br>Number (%) |
|--------------------------------|-------------------------------------------------------------------------------------------------------------|------------------------------------------------------------------------------------------------------|
| <b>Gender*</b>                 |                                                                                                             |                                                                                                      |
| Males                          | 2,563,675 (48.5%)                                                                                           | 3,769 (66.0%)                                                                                        |
| Females                        | 2,726,019 (51.5%)                                                                                           | 1,940 (44.0%)                                                                                        |
| <b>Age groups*</b>             |                                                                                                             |                                                                                                      |
| 0-15                           | 913,969 (17.3%)                                                                                             | 2,362 (41.4%)                                                                                        |
| 16-24                          | 631,094 (11.9%)                                                                                             | 1,394 (24.4%)                                                                                        |
| 25-34                          | 666,725 (12.6%)                                                                                             | 602 (10.5%)                                                                                          |
| 35-44                          | 734,304 (13.9%)                                                                                             | 450 (7.9%)                                                                                           |
| 45-54                          | 786,355 (14.9%)                                                                                             | 401 (7.0%)                                                                                           |
| 55-64                          | 667,157 (12.6%)                                                                                             | 256 (4.5%)                                                                                           |
| 65+                            | 890,090 (16.8%)                                                                                             | 244 (4.3%)                                                                                           |
| <b>Country of birth*</b>       |                                                                                                             |                                                                                                      |
| UK                             | 4,920,614 (93.0%)                                                                                           | 5,505 (96.4%)                                                                                        |
| Other Europe                   | 172,160 (3.3%)                                                                                              | 83 (1.5%)                                                                                            |
| Africa                         | 46,708 (0.9%)                                                                                               | 34 (0.6%)                                                                                            |
| Middle East and Asia           | 104,480 (2.0%)                                                                                              | 50 (0.9%)                                                                                            |
| The Americas and the Caribbean | 33,325 (0.6%)                                                                                               | 28 (0.5%)                                                                                            |
| Other                          | 12,407 (0.2%)                                                                                               | 9 (0.2%)                                                                                             |
| <b>Ethnicity</b>               |                                                                                                             |                                                                                                      |
| White                          | 5,078,910 (96.0%)                                                                                           | 5,497 (96.3%)                                                                                        |
| Asian                          | 140,542 (2.7%)                                                                                              | 136 (2.4%)                                                                                           |
| Mixed/multiple ethnicities     | 19,775 (0.4%)                                                                                               | 40 (0.7%)                                                                                            |

1  
2  
3  
4  
5  
6  
7  
8  
9  
10  
11  
12  
13  
14  
15  
16  
17  
18  
19  
20  
21  
22  
23  
24  
25  
26  
27  
28  
29  
30  
31  
32  
33  
34  
35  
36  
37  
38  
39  
40  
41  
42  
43  
44  
45  
46

|                     |               |           |
|---------------------|---------------|-----------|
| African             | 29,615 (0.6%) | 23 (0.4%) |
| Caribbean or black  | 6,536 (0.1%)  | 4 (0.1%)  |
| Other ethnic groups | 14,316 (0.3%) | 9 (0.2%)  |

\*People with co-occurring intellectual disabilities and autism versus people without co-occurring intellectual disabilities and autism; p<0.01

For peer review only

Table 2: Prevalence of comorbidities in people with and without co-occurring intellectual disabilities and autism by age and sex

| People with co-occurring intellectual disabilities and autism    |                                         |                          |                               |                                    |                             |                                 |                                      |                           |                               |
|------------------------------------------------------------------|-----------------------------------------|--------------------------|-------------------------------|------------------------------------|-----------------------------|---------------------------------|--------------------------------------|---------------------------|-------------------------------|
| Condition                                                        | Children/youth, 0-15 years<br>N=2,362   |                          |                               | Adults, 16-64 years<br>N=3,103     |                             |                                 | Older people, 65+ years<br>N=244     |                           |                               |
|                                                                  | M<br>N=1,563<br>(100%)                  | F<br>N=799<br>(100%)     | Total<br>N=2,362<br>(100%)    | M<br>N= 2,073<br>(100%)            | F<br>N= 1,030<br>(100%)     | Total<br>N= 3,103<br>(100%)     | M<br>N= 133<br>(100%)                | F<br>N= 111<br>(100%)     | Total<br>N= 244<br>(100%)     |
| <b>Mental health condition</b>                                   | 328<br>(21.0%)                          | 152<br>(19.0%)           | 480<br>(20.3%)                | 768<br>(37.0%)                     | 377<br>(36.6%)              | 1,145<br>(36.9%)                | 80<br>(60.2%)                        | 80<br>(72.1%)             | 160<br>(65.6%)                |
| <b>Blindness/partial sight loss</b>                              | 214<br>(13.7%)                          | 177<br>(22.2%)           | 391<br>(16.6%)                | 355<br>(17.1%)                     | 220<br>(21.4%)              | 575<br>(18.5%)                  | 71<br>(53.3%)                        | 80<br>(72.1%)             | 151<br>(61.9%)                |
| <b>Deafness/partial hearing loss</b>                             | 148<br>(9.5%)                           | 95<br>(11.9%)            | 243<br>(10.3%)                | 301<br>(14.5%)                     | 190<br>(18.4%)              | 491<br>(15.8%)                  | 73<br>(54.9%)                        | 81<br>(73.0%)             | 154<br>(63.1%)                |
| <b>Physical disability</b>                                       | 618<br>(39.5%)                          | 458<br>(57.3%)           | 1,076<br>(45.6%)              | 719<br>(34.7%)                     | 508<br>(49.3%)              | 1,227<br>(39.5%)                | 86<br>(64.7%)                        | 99<br>(89.2%)             | 185<br>(75.8%)                |
| People without co-occurring intellectual disabilities and autism |                                         |                          |                               |                                    |                             |                                 |                                      |                           |                               |
| Condition                                                        | Children/youth, 0-15 years<br>N=913,969 |                          |                               | Adults, 16-64 years<br>N=3,485,635 |                             |                                 | Older people, 65+ years<br>N=890,090 |                           |                               |
|                                                                  | M<br>N=467,543<br>(100%)                | F<br>N=446,426<br>(100%) | Total<br>N= 913,969<br>(100%) | M<br>N= 1,712,526<br>(100%)        | F<br>N= 1,773,109<br>(100%) | Total<br>N= 3,485,635<br>(100%) | M<br>N= 383,606<br>(100%)            | F<br>N= 506,484<br>(100%) | Total<br>N= 890,090<br>(100%) |
| <b>Mental health condition</b>                                   | 1,861<br>(0.4%)                         | 980<br>(0.2%)            | 2,841<br>(0.3%)               | 92,308<br>(5.4%)                   | 95,108<br>(5.4%)            | 187,416<br>(5.4%)               | 14,760<br>(3.8%)                     | 26,141<br>(5.2%)          | 40,901<br>(4.6%)              |
| <b>Blindness/partial sight loss</b>                              | 1,793<br>(0.4%)                         | 1,439<br>(0.3%)          | 3,232<br>(0.4%)               | 24,129<br>(1.4%)                   | 16,954<br>(1.0%)            | 41,083<br>(1.2%)                | 30,389<br>(7.9%)                     | 49,839<br>(9.8%)          | 80,228<br>(9.0%)              |
| <b>Deafness/partial hearing loss</b>                             | 2,731<br>(0.6%)                         | 2,225<br>(0.5%)          | 4,956<br>(0.5%)               | 70,543<br>(4.1%)                   | 48,727<br>(2.7%)            | 119,270<br>(3.4%)               | 111,447<br>(29.1%)                   | 114,393<br>(22.6%)        | 225,840<br>(25.4%)            |
| <b>Physical disability</b>                                       | 3,637<br>(0.8%)                         | 2,799<br>(0.6%)          | 6,436<br>(0.7%)               | 81,655<br>(4.8%)                   | 82,968<br>(4.7%)            | 164,623<br>(4.7%)               | 73,759<br>(19.2%)                    | 109,103<br>(21.5%)        | 182,862<br>(20.5%)            |

Table 3: Effect of co-occurring intellectual disabilities and autism on mental health conditions in the whole population, adjusted for sex and age

| Characteristic                                    |                                                   | Regression 1 |                         | Regression 2 (including the interaction term: age x co-occurring intellectual disabilities and autism) |                         |
|---------------------------------------------------|---------------------------------------------------|--------------|-------------------------|--------------------------------------------------------------------------------------------------------|-------------------------|
|                                                   |                                                   | Odds ratio   | 95% confidence interval | Odds ratio                                                                                             | 95% confidence interval |
| Co-occurring intellectual disabilities and autism | Not present (reference)                           | -            | -                       | -                                                                                                      | -                       |
|                                                   | Co-occurring intellectual disabilities and autism | 25.553       | 23.933-27.282           | 130.803                                                                                                | 117.131-146.070         |
| Sex                                               | Male (reference)                                  | -            | -                       | -                                                                                                      | -                       |
|                                                   | Female                                            | 1.275        | 1.264-1.286             | 1.275                                                                                                  | 1.264-1.286             |
| Age                                               | 0-15 (reference)                                  | -            | -                       | -                                                                                                      | -                       |
|                                                   | 16-24                                             | 9.449        | 9.039-9.877             | 11.322                                                                                                 | 10.781-11.890           |
|                                                   | 25-34                                             | 21.168       | 20.285-22.090           | 25.305                                                                                                 | 24.134-26.532           |
|                                                   | 35-44                                             | 29.725       | 28.497-31.004           | 35.493                                                                                                 | 33.866-37.199           |
|                                                   | 45-54                                             | 29.186       | 27.983-30.441           | 34.835                                                                                                 | 33.239-36.507           |
|                                                   | 55-64                                             | 22.633       | 21.633-23.617           | 26.997                                                                                                 | 25.750-28.304           |
|                                                   | 65+                                               | 19.319       | 18.518-20.155           | 23.005                                                                                                 | 21.947-24.115           |
| Age x both intellectual disabilities and autism   | 0-15 (reference)                                  | -            | -                       | -                                                                                                      | -                       |
|                                                   | 16-24                                             | -            | -                       | 0.152                                                                                                  | 0.129-0.178             |
|                                                   | 25-34                                             | -            | -                       | 0.101                                                                                                  | 0.083-0.123             |
|                                                   | 35-44                                             | -            | -                       | 0.083                                                                                                  | 0.067-0.104             |
|                                                   | 45-54                                             | -            | -                       | 0.089                                                                                                  | 0.071-0.112             |
|                                                   | 55-64                                             | -            | -                       | 0.118                                                                                                  | 0.090-0.154             |
|                                                   | 65+                                               | -            | -                       | 0.308                                                                                                  | 0.238-0.423             |
| Constant                                          | -                                                 | 0.002        | -                       | 0.002                                                                                                  | -                       |

Table 4: Effect of co-occurring intellectual disabilities and autism on blindness/partial sight loss in the whole population, adjusted for sex and age

| Characteristic                                    |                                                   | Regression 1 |                         | Regression 2 (including the interaction term: age x co-occurring intellectual disabilities and autism) |                         |
|---------------------------------------------------|---------------------------------------------------|--------------|-------------------------|--------------------------------------------------------------------------------------------------------|-------------------------|
|                                                   |                                                   | Odds ratio   | 95% confidence interval | Odds ratio                                                                                             | 95% confidence interval |
| Co-occurring intellectual disabilities and autism | Not present (reference)                           | -            | -                       | -                                                                                                      | -                       |
|                                                   | Co-occurring intellectual disabilities and autism | 36.781       | 34.212-39.542           | 65.897                                                                                                 | 58.743-73.922           |
| Sex                                               | Male (reference)                                  | -            | -                       | -                                                                                                      | -                       |
|                                                   | Female                                            | 1.011        | 0.999-1.022             | 1.011                                                                                                  | 0.999-1.022             |
| Age                                               | 0-15 (reference)                                  | -            | -                       | -                                                                                                      | -                       |
|                                                   | 16-24                                             | 1.557        | 1.482-1.636             | 1.663                                                                                                  | 1.579-1.751             |
|                                                   | 25-34                                             | 1.824        | 1.739-1.913             | 1.914                                                                                                  | 1.821-2.011             |
|                                                   | 35-44                                             | 2.548        | 2.439-2.663             | 2.687                                                                                                  | 2.567-2.813             |
|                                                   | 45-54                                             | 4.416        | 4.241-4.599             | 4.668                                                                                                  | 4.475-4.870             |
|                                                   | 55-64                                             | 7.503        | 7.215-7.803             | 7.928                                                                                                  | 7.609-8.260             |
|                                                   | 65+                                               | 31.064       | 29.947-32.222           | 32.750                                                                                                 | 31.512-34.036           |
| Age x both intellectual disabilities and autism   | 0-15 (reference)                                  | -            | -                       | -                                                                                                      | -                       |
|                                                   | 16-24                                             | -            | -                       | 0.433                                                                                                  | 0.354-0.528             |
|                                                   | 25-34                                             | -            | -                       | 0.669                                                                                                  | 0.521-0.844             |
|                                                   | 35-44                                             | -            | -                       | 0.529                                                                                                  | 0.411-0.681             |
|                                                   | 45-54                                             | -            | -                       | 0.368                                                                                                  | 0.286-0.474             |
|                                                   | 55-64                                             | -            | -                       | 0.278                                                                                                  | 0.208-0.372             |
|                                                   | 65+                                               | -            | -                       | 0.250                                                                                                  | 0.188-0.331             |
| Constant                                          | -                                                 | 0.003        | -                       | 0.003                                                                                                  | -                       |

Table 5: Effect of co-occurring intellectual disabilities and autism on deafness/partial hearing loss in the whole population, adjusted for sex and age

| Characteristic                                    |                                                   | Regression 1 |                         | Regression 2 (including the interaction term: age x co-occurring intellectual disabilities and autism) |                         |
|---------------------------------------------------|---------------------------------------------------|--------------|-------------------------|--------------------------------------------------------------------------------------------------------|-------------------------|
|                                                   |                                                   | Odds ratio   | 95% confidence interval | Odds ratio                                                                                             | 95% confidence interval |
| Co-occurring intellectual disabilities and autism | Not present (reference)                           | -            | -                       | -                                                                                                      | -                       |
|                                                   | Co-occurring intellectual disabilities and autism | 11.331       | 10.430-12.309           | 21.996                                                                                                 | 19.196-25.205           |
| Sex                                               | Male (reference)                                  | -            | -                       | -                                                                                                      | -                       |
|                                                   | Female                                            | 0.687        | 0.682-0.693             | 0.688                                                                                                  | 0.682-0.693             |
| Age                                               | 0-15 (reference)                                  | -            | -                       | -                                                                                                      | -                       |
|                                                   | 16-24                                             | 1.557        | 1.496-1.621             | 1.588                                                                                                  | 1.524-1.654             |
|                                                   | 25-34                                             | 2.358        | 2.274-2.446             | 2.408                                                                                                  | 2.321-2.499             |
|                                                   | 35-44                                             | 4.237        | 4.099-4.379             | 4.347                                                                                                  | 4.203-4.495             |
|                                                   | 45-54                                             | 8.546        | 8.285-8.815             | 8.769                                                                                                  | 8.496-9.051             |
|                                                   | 55-64                                             | 18.761       | 18.204-19.336           | 19.243                                                                                                 | 18.659-19.845           |
|                                                   | 65+                                               | 69.646       | 67.633-71.719           | 71.378                                                                                                 | 69.269-73.552           |
| Age x both intellectual disabilities and autism   | 0-15 (reference)                                  | -            | -                       | -                                                                                                      | -                       |
|                                                   | 16-24                                             | -            | -                       | 0.633                                                                                                  | 0.507-0.790             |
|                                                   | 25-34                                             | -            | -                       | 0.735                                                                                                  | 0.569-0.948             |
|                                                   | 35-44                                             | -            | -                       | 0.394                                                                                                  | 0.296-0.523             |
|                                                   | 45-54                                             | -            | -                       | 0.288                                                                                                  | 0.219-0.378             |
|                                                   | 55-64                                             | -            | -                       | 0.215                                                                                                  | 0.159-0.289             |
|                                                   | 65+                                               | -            | -                       | 0.222                                                                                                  | 0.165-0.298             |
| Constant                                          | -                                                 | 0.006        | -                       | 0.006                                                                                                  | -                       |



Table 6: Effect of co-occurring intellectual disabilities and autism on physical disability in the whole population, adjusted for sex and age

| Characteristic                                    |                                                   | Regression 1 |                         | Regression 2 (including the interaction term: age x co-occurring intellectual disabilities and autism) |                         |
|---------------------------------------------------|---------------------------------------------------|--------------|-------------------------|--------------------------------------------------------------------------------------------------------|-------------------------|
|                                                   |                                                   | Odds ratio   | 95% confidence interval | Odds ratio                                                                                             | 95% confidence interval |
| Co-occurring intellectual disabilities and autism | Not present (reference)                           | -            | -                       | -                                                                                                      | -                       |
|                                                   | Co-occurring intellectual disabilities and autism | 61.159       | 57.601-64.938           | 157.535                                                                                                | 144.577-171.655         |
| Sex                                               | Male (reference)                                  | -            | -                       | -                                                                                                      | -                       |
|                                                   | Female                                            | 1.063        | 1.055-1.070             | 1.063                                                                                                  | 1.055-1.070             |
| Age                                               | 0-15 (reference)                                  | -            | -                       | -                                                                                                      | -                       |
|                                                   | 16-24                                             | 1.440        | 1.388-1.495             | 1.573                                                                                                  | 1.513-1.637             |
|                                                   | 25-34                                             | 2.603        | 2.519-2.690             | 2.857                                                                                                  | 2.760-2.958             |
|                                                   | 35-44                                             | 5.869        | 5.699-6.043             | 6.465                                                                                                  | 6.267-6.670             |
|                                                   | 45-54                                             | 10.606       | 10.312-10.908           | 11.662                                                                                                 | 11.318-12.017           |
|                                                   | 55-64                                             | 20.730       | 20.166-21.310           | 22.756                                                                                                 | 22.096-23.436           |
|                                                   | 65+                                               | 43.680       | 42.517-44.875           | 47.894                                                                                                 | 46.530-49.298           |
| Age x both intellectual disabilities and autism   | 0-15 (reference)                                  | -            | -                       | -                                                                                                      | -                       |
|                                                   | 16-24                                             | -            | -                       | 0.410                                                                                                  | 0.355-0.472             |
|                                                   | 25-34                                             | -            | -                       | 0.344                                                                                                  | 0.287-0.414             |
|                                                   | 35-44                                             | -            | -                       | 0.123                                                                                                  | 0.100-0.152             |
|                                                   | 45-54                                             | -            | -                       | 0.075                                                                                                  | 0.061-0.094             |
|                                                   | 55-64                                             | -            | -                       | 0.044                                                                                                  | 0.034-0.057             |
|                                                   | 65+                                               | -            | -                       | 0.050                                                                                                  | 0.039-0.066             |
| Constant                                          | -                                                 | 0.006        | -                       | 0.005                                                                                                  | -                       |

1  
2  
3  
4  
5  
6  
7  
8  
9  
10  
11  
12  
13  
14  
15  
16  
17  
18  
19  
20  
21  
22  
23  
24  
25  
26  
27  
28  
29  
30  
31  
32  
33  
34  
35  
36  
37  
38  
39  
40  
41  
42  
43  
44  
45  
46  
47  
48  
49  
50  
51  
52  
53  
54  
55  
56  
57  
58  
59  
60STROBE Statement—Checklist of items that should be included in reports of *cross-sectional studies*

|                              | <b>Item No</b> | <b>Recommendation</b>                                                                                                                                                                             |
|------------------------------|----------------|---------------------------------------------------------------------------------------------------------------------------------------------------------------------------------------------------|
| <b>Title and abstract</b>    | 1              | (a) Indicate the study's design with a commonly used term in the title or the abstract<br>Page 1 (title)                                                                                          |
|                              |                | (b) Provide in the abstract an informative and balanced summary of what was done and what was found<br>Page 2                                                                                     |
| <b>Introduction</b>          |                |                                                                                                                                                                                                   |
| Background/rationale         | 2              | Explain the scientific background and rationale for the investigation being reported<br>Pages 4-7                                                                                                 |
| Objectives                   | 3              | State specific objectives, including any pre-specified hypotheses<br>Page 7, line 9                                                                                                               |
| <b>Methods</b>               |                |                                                                                                                                                                                                   |
| Study design                 | 4              | Present key elements of study design early in the paper<br>Page 8-11                                                                                                                              |
| Setting                      | 5              | Describe the setting, locations, and relevant dates, including periods of recruitment, exposure, follow-up, and data collection<br>Page 7-8                                                       |
| Participants                 | 6              | (a) Give the eligibility criteria, and the sources and methods of selection of participants<br>Page 7-8                                                                                           |
| Variables                    | 7              | Clearly define all outcomes, exposures, predictors, potential confounders, and effect modifiers. Give diagnostic criteria, if applicable<br>Page 8-10                                             |
| Data sources/<br>measurement | 8*             | For each variable of interest, give sources of data and details of methods of assessment (measurement). Describe comparability of assessment methods if there is more than one group<br>Page 7-10 |
| Bias                         | 9              | Describe any efforts to address potential sources of bias<br>Page 9-10                                                                                                                            |
| Study size                   | 10             | Explain how the study size was arrived at<br>Page 7-8                                                                                                                                             |
| Quantitative variables       | 11             | Explain how quantitative variables were handled in the analyses. If applicable, describe which groupings were chosen and why<br>Page 10-11                                                        |
| Statistical methods          | 12             | (a) Describe all statistical methods, including those used to control for confounding<br>Page 10-11                                                                                               |
|                              |                | (b) Describe any methods used to examine subgroups and interactions<br>Page 10-11                                                                                                                 |
|                              |                | (c) Explain how missing data were addressed<br>Page 10                                                                                                                                            |
|                              |                | (d) If applicable, describe analytical methods taking account of sampling strategy<br>N/A                                                                                                         |
|                              |                | (e) Describe any sensitivity analyses<br>N/A                                                                                                                                                      |

**Results**

|                          |     |                                                                                                                                                                                                                                                                                                                                                                                                                                                       |
|--------------------------|-----|-------------------------------------------------------------------------------------------------------------------------------------------------------------------------------------------------------------------------------------------------------------------------------------------------------------------------------------------------------------------------------------------------------------------------------------------------------|
| Participants             | 13* | (a) Report numbers of individuals at each stage of study—eg numbers potentially eligible, examined for eligibility, confirmed eligible, included in the study, completing follow-up, and analysed<br>Page 11-12<br>(b) Give reasons for non-participation at each stage<br>N/A<br>(c) Consider use of a flow diagram<br>N/A                                                                                                                           |
| Descriptive data         | 14* | (a) Give characteristics of study participants (eg demographic, clinical, social) and information on exposures and potential confounders<br>Page 11-12, Table 1<br>(b) Indicate number of participants with missing data for each variable of interest<br>Page 10                                                                                                                                                                                     |
| Outcome data             | 15* | Report numbers of outcome events or summary measures<br>Page 13-15                                                                                                                                                                                                                                                                                                                                                                                    |
| Main results             | 16  | (a) Give unadjusted estimates and, if applicable, confounder-adjusted estimates and their precision (eg, 95% confidence interval). Make clear which confounders were adjusted for and why they were included<br>Page 12-14, Tables 3-6<br>(b) Report category boundaries when continuous variables were categorized<br>N/A<br>(c) If relevant, consider translating estimates of relative risk into absolute risk for a meaningful time period<br>N/A |
| Other analyses           | 17  | Report other analyses done—eg analyses of subgroups and interactions, and sensitivity analyses<br>Page 12-14                                                                                                                                                                                                                                                                                                                                          |
| <b>Discussion</b>        |     |                                                                                                                                                                                                                                                                                                                                                                                                                                                       |
| Key results              | 18  | Summarise key results with reference to study objectives<br>Page 15-17                                                                                                                                                                                                                                                                                                                                                                                |
| Limitations              | 19  | Discuss limitations of the study, taking into account sources of potential bias or imprecision. Discuss both direction and magnitude of any potential bias<br>Page 18-20                                                                                                                                                                                                                                                                              |
| Interpretation           | 20  | Give a cautious overall interpretation of results considering objectives, limitations, multiplicity of analyses, results from similar studies, and other relevant evidence<br>Page 15-20                                                                                                                                                                                                                                                              |
| Generalisability         | 21  | Discuss the generalisability (external validity) of the study results<br>Page 18                                                                                                                                                                                                                                                                                                                                                                      |
| <b>Other information</b> |     |                                                                                                                                                                                                                                                                                                                                                                                                                                                       |
| Funding                  | 22  | Give the source of funding and the role of the funders for the present study and, if applicable, for the original study on which the present article is based<br>Page 25                                                                                                                                                                                                                                                                              |

\*Give information separately for exposed and unexposed groups.

**Note:** An Explanation and Elaboration article discusses each checklist item and gives methodological background and published examples of transparent reporting. The STROBE checklist is best used in conjunction with this article (freely

1  
2  
3  
4  
5  
6  
7  
8  
9  
10  
11  
12  
13  
14  
15  
16  
17  
18  
19  
20  
21  
22  
23  
24  
25  
26  
27  
28  
29  
30  
31  
32  
33  
34  
35  
36  
37  
38  
39  
40  
41  
42  
43  
44  
45  
46  
47  
48  
49  
50  
51  
52  
53  
54  
55  
56  
57  
58  
59  
60

available on the Web sites of PLoS Medicine at <http://www.plosmedicine.org/>, Annals of Internal Medicine at <http://www.annals.org/>, and Epidemiology at <http://www.epidem.com/>). Information on the STROBE Initiative is available at [www.strobe-statement.org](http://www.strobe-statement.org).

For peer review only

# BMJ Open

**The prevalence of mental health conditions, sensory impairments, and physical disability in people with co-occurring intellectual disabilities and autism compared with other people – a cross-sectional total population study in Scotland**

|                                 |                                                                                                                                                                                                                                                                                   |
|---------------------------------|-----------------------------------------------------------------------------------------------------------------------------------------------------------------------------------------------------------------------------------------------------------------------------------|
| Journal:                        | <i>BMJ Open</i>                                                                                                                                                                                                                                                                   |
| Manuscript ID                   | bmjopen-2019-035280.R2                                                                                                                                                                                                                                                            |
| Article Type:                   | Original research                                                                                                                                                                                                                                                                 |
| Date Submitted by the Author:   | 10-Mar-2020                                                                                                                                                                                                                                                                       |
| Complete List of Authors:       | Dunn, Kirsty; University of Glasgow, Health and Wellbeing<br>Rydzewska, Ewelina; University of Glasgow, Institute of Health and Wellbeing<br>Fleming, Michael ; University of Glasgow, Public Health<br>Cooper, Sally-Ann; Glasgow University , Institute of Health and Wellbeing |
| <b>Primary Subject Heading</b>: | Mental health                                                                                                                                                                                                                                                                     |
| Secondary Subject Heading:      | Public health                                                                                                                                                                                                                                                                     |
| Keywords:                       | MENTAL HEALTH, Adult psychiatry < PSYCHIATRY, PUBLIC HEALTH                                                                                                                                                                                                                       |
|                                 |                                                                                                                                                                                                                                                                                   |

SCHOLARONE™  
Manuscripts



I, the Submitting Author has the right to grant and does grant on behalf of all authors of the Work (as defined in the below author licence), an exclusive licence and/or a non-exclusive licence for contributions from authors who are: i) UK Crown employees; ii) where BMJ has agreed a CC-BY licence shall apply, and/or iii) in accordance with the terms applicable for US Federal Government officers or employees acting as part of their official duties; on a worldwide, perpetual, irrevocable, royalty-free basis to BMJ Publishing Group Ltd ("BMJ") its licensees and where the relevant Journal is co-owned by BMJ to the co-owners of the Journal, to publish the Work in this journal and any other BMJ products and to exploit all rights, as set out in our [licence](#).

The Submitting Author accepts and understands that any supply made under these terms is made by BMJ to the Submitting Author unless you are acting as an employee on behalf of your employer or a postgraduate student of an affiliated institution which is paying any applicable article publishing charge ("APC") for Open Access articles. Where the Submitting Author wishes to make the Work available on an Open Access basis (and intends to pay the relevant APC), the terms of reuse of such Open Access shall be governed by a Creative Commons licence – details of these licences and which [Creative Commons](#) licence will apply to this Work are set out in our licence referred to above.

Other than as permitted in any relevant BMJ Author's Self Archiving Policies, I confirm this Work has not been accepted for publication elsewhere, is not being considered for publication elsewhere and does not duplicate material already published. I confirm all authors consent to publication of this Work and authorise the granting of this licence.

1  
2  
3 The prevalence of mental health conditions, sensory impairments,  
4 and physical disability in people with co-occurring intellectual  
5 disabilities and autism compared with other people – a cross  
6 sectional total population study in Scotland  
7  
8  
9  
10  
11  
12  
13  
14

15 Kirsty Dunn\*

16  
17 Ewelina Rydzewska (University of Glasgow, Glasgow, UK)

18  
19 Michael Fleming (University of Glasgow, Glasgow, UK)

20  
21 Sally-Ann Cooper (University of Glasgow, Glasgow, UK)  
22  
23  
24  
25  
26  
27

28 \*Corresponding author

29  
30 Kirsty Dunn

31  
32 [Kirsty.wright@glasgow.ac.uk](mailto:Kirsty.wright@glasgow.ac.uk)  
33

34  
35 07975867751

36  
37 Institute of Health and Wellbeing

38  
39 University of Glasgow

40  
41 Glasgow

42  
43 UK  
44  
45  
46  
47  
48  
49  
50

51 **Word count:** 3,210  
52  
53  
54

55 **Keywords:** Intellectual disabilities, autism, mental health conditions, sensory  
56 impairments, physical disability.  
57  
58  
59  
60

1  
2  
3  
4  
5  
6  
7  
8  
9  
10  
11  
12  
13  
14  
15  
16  
17  
18  
19  
20  
21  
22  
23  
24  
25  
26  
27  
28  
29  
30  
31  
32  
33  
34  
35  
36  
37  
38  
39  
40  
41  
42  
43  
44  
45  
46  
47  
48  
49  
50  
51  
52  
53  
54  
55  
56  
57  
58  
59  
60

For peer review only



## Abstract (281 words)

**Objectives:** To investigate prevalence of mental health conditions, sensory impairments, and physical disability in children, adults, and older adults with co-occurring intellectual disabilities and autism, given its frequent co-occurrence, compared with the general population.

**Design:** Whole country cohort study.

**Setting:** General community.

**Participants:** 5,709 people with co-occurring intellectual disabilities and autism, compared with 5,289,694 other people.

**Outcome measures:** Rates and odds ratios (OR) with 95% confidence intervals (95% CI) for mental health conditions, visual impairment, hearing impairment and physical disability in people with co-occurring intellectual disabilities and autism compared with other people, adjusted for age, sex, and interaction between age and co-occurring intellectual disabilities and autism.

**Results:** All four long-term conditions were markedly more common in children, adults, and older adults with co-occurring intellectual disabilities and autism compared with other people. For mental health, OR=130.8 (95% CI 117.1, 146.1); visual impairment OR=65.9 (95% CI 58.7, 73.9); hearing impairment OR=22.0 (95% CI 19.2, 25.2); physical disability OR=157.5 (95% CI 144.6, 171.7). These ratios are also greater than previously reported for people with *either* intellectual disabilities *or* autism rather than co-occurring intellectual disabilities and autism.

**Conclusions:** We have quantified the more than double disadvantage for people with co-occurring intellectual disabilities and autism, in terms of additional long-term health conditions. This may well impact on quality of life. It raises challenges for staff working with these people in view of additional

1  
2  
3 complexity in assessments, diagnoses, and interventions of additional health  
4 conditions, as sensory impairments and mental health conditions in particular,  
5 compound with the persons pre-existing communication and cognitive  
6 problems in this context. Planning is important, with staff being trained,  
7 equipped, resourced and prepared to address the challenge of working for  
8 people with these conditions.  
9  
10  
11  
12  
13  
14  
15  
16  
17  
18  
19

## 20 **Strengths and limitations of this study**

- 21 • Large scale, whole country study, with a high response rate (94%), so the  
22 results are representative of the whole population.
- 23 • Intellectual disabilities, autism, and additional long-term conditions were  
24 enquired about systematically for everyone in the population.
- 25 • The wording of questions was tested in advance, via cognitive question  
26 testing during the design of Scotland's Census, 2011.
- 27 • Limitations include proxy-reporting.
- 28 • People known to have autism/Asperger's syndrome, intellectual disabilities,  
29 and the four long-term conditions were reported, rather than each  
30 undergoing detailed individual research assessments which are not possible  
31 in such large population studies.  
32  
33  
34  
35  
36  
37  
38  
39  
40  
41  
42  
43  
44  
45  
46  
47  
48  
49  
50  
51  
52  
53  
54  
55  
56  
57  
58  
59  
60

## Background

People with intellectual disabilities<sup>1-4</sup> and people with autism<sup>5-7</sup> have more mental and physical health needs than other people. A whole population study using the Scotland Census 2011 reported that 21.7% of people with intellectual disabilities also had autism, and 18.0% of people with autism also had intellectual disabilities,<sup>8</sup> so this dually diagnosed group warrant investigation. One would suspect that this population with co-occurring intellectual disabilities and autism is likely to have a high level of additional health needs, but this has received little previous attention. A higher number of additional health needs increases the likelihood of misdiagnosis, and treatment interactions, so requires more complex treatment plans. Hence it is important to investigate long-term additional health needs experienced by people with co-occurring intellectual disabilities and autism.

Some studies have investigated mental ill-health in people with co-occurring intellectual disabilities and autism. A small study of 149 adults with severe or profound intellectual disabilities and autism, living in state-run developmental centres in Louisiana, USA, compared co-existing conditions with 158 adults with intellectual disabilities without autism in the same centres. The former group had more symptomology for anxiety, mania, schizophrenia, stereotypies, self-injurious behaviour, eating disorders, sexual disorders, and impulse control.<sup>9</sup> A study in Norway compared 62 adults with co-occurring autism and intellectual disabilities under the care of autism services, with 132 adults with intellectual disabilities only receiving intellectual disabilities support.<sup>10</sup> High levels of psychiatric disorders were reported in both groups; 53.2% in the co-occurring intellectual disabilities and autism group, and 17.4%

1  
2  
3 in the intellectual disabilities only group. An English study of referrals to a  
4 specialist intellectual disabilities psychiatric service described 42% of the 137  
5 referred adults who had autism as well as intellectual disabilities to have co-  
6 existing psychopathology, most commonly schizophrenia.<sup>11</sup> A study of youth  
7 aged 14-20 years age, gender matched 36 people with co-occurring intellectual  
8 disabilities and autism with 36 people with intellectual disabilities without  
9 autism.<sup>12</sup> They reported the former group to have more episodes of mental ill-  
10 health, most commonly depression. A study of people aged 8-29 years with  
11 intellectual disabilities and challenging behaviour living in four residential units  
12 in England included 69 who also had autism and 13 who did not.<sup>13</sup> They  
13 reported a higher prevalence of organic disorders, anxiety and stereotypies in  
14 the young people with co-occurring intellectual disabilities and autism. This  
15 literature is difficult to summarise overall, as, as well as having small sample  
16 sizes, the participants were not drawn from representative populations.  
17  
18  
19  
20  
21  
22  
23  
24  
25  
26  
27  
28  
29  
30  
31  
32  
33  
34

35 A further study had the advantage of being population-based, but was still  
36 small in size.<sup>14</sup> It compared the prevalence, and incidence, of mental ill-health  
37 in 77 adults with co-occurring intellectual disabilities and autism with 946  
38 adults with intellectual disabilities without autism, and also with 154  
39 individually age, gender, ability-level, and Down syndrome matched controls.  
40 The adults with autism had a higher point prevalence of problem behaviours  
41 than the 946 without autism, but compared with the 154 matched controls  
42 there was no difference in prevalence, or incidence of either problem  
43 behaviours or other mental ill-health.<sup>14</sup> Three large whole population studies  
44 using the Scotland Census 2011 have reported that of people with intellectual  
45 disabilities, 21.7% reported mental health conditions;<sup>3</sup> and of people with  
46 autism, 33.0% of adults,<sup>6</sup> and 7.6% of children<sup>7</sup> reported mental health  
47  
48  
49  
50  
51  
52  
53  
54  
55  
56  
57  
58  
59  
60

1  
2  
3 conditions, but did not report the rates for people with co-occurring  
4 intellectual disabilities and autism.  
5  
6  
7  
8  
9

10 A recent study of Medicare claims data in Wisconsin, USA, by Bishop &  
11 Rubenstein (2019) compared the physical and mental health conditions for  
12 adults aged 40-88 years old with a diagnosis of autism only (N= 79) to those  
13 with a diagnosis of both autism and intellectual disabilities (N= 64) between  
14 2012 and 2015. The prevalence of chronic medical conditions was high among  
15 the entire sample, with elevated but not statistically significant prevalence  
16 rates for adults with both autism and intellectual disabilities on most  
17 conditions. However, odds ratios revealed a decreased likelihood of anxiety  
18 and depression for individuals with both autism and intellectual disabilities,  
19 and a higher likelihood of epilepsy compared to those with autism only<sup>15</sup>. As  
20 the adults in this study were registered with Medicare, the sample may  
21 represent a lower socioeconomic group than those with autism in the general  
22 population. Given the age of the sample, and the changes in diagnostic criteria  
23 for autism, this sample may not represent adults who are at the high  
24 functioning end of the spectrum.  
25  
26  
27  
28  
29  
30  
31  
32  
33  
34  
35  
36  
37  
38  
39  
40  
41  
42  
43

44 With regards to sensory impairments, of the 36 matched youth with  
45 intellectual disabilities with and without autism, 38.9% with autism reported  
46 having visual problems compared with 50.0% without autism, and 13.9% with  
47 autism reported having hearing problems compared with 19.4% without  
48 autism.<sup>12</sup> An intellectual disabilities register study reported that 95 of the 368  
49 (25.8%) adults with intellectual disabilities who had visual impairment also had  
50 markers for autism, compared with 422 of 2,674 (16%) of those who had  
51 normal vision, and that 46 of the 60 (76.7%) of the adults with intellectual  
52  
53  
54  
55  
56  
57  
58  
59  
60

1  
2  
3 disabilities and congenital blindness also had markers for autism, compared  
4 with only 36 of the 67 (53.7%) with normal vision.<sup>16</sup>  
5  
6  
7  
8

9  
10 We have not identified other papers on sensory impairments or any on  
11 physical disabilities in people with co-occurring intellectual disabilities and  
12 autism. However, previous large whole population studies which analysed data  
13 from the Scotland Census 2011 have reported that of people with intellectual  
14 disabilities, 12.4% reported blindness/sight loss, 13.1% reported  
15 deafness/hearing loss, and 32.6% reported physical disability.<sup>3</sup> Of people with  
16 autism, 12.1% of adults<sup>6</sup> and 3.5% of children reported blindness/sight loss,<sup>7</sup>  
17 14.1% of adults<sup>6</sup> and 2.9% of children reported deafness/hearing loss,<sup>7</sup> and  
18 24.0% of adults<sup>6</sup> and 10.7% of children reported physical disability.<sup>7</sup> They did  
19 not, however, report the rates of these conditions for people with co-occurring  
20 intellectual disabilities and autism.  
21  
22  
23  
24  
25  
26  
27  
28  
29  
30  
31  
32  
33  
34

35 This high prevalence of health conditions among people with intellectual  
36 disabilities and people with autism spectrum disorders is partly attributable  
37 health inequalities<sup>17,18</sup>, and to the fact that certain conditions, such as cerebral  
38 palsy, are associated with both intellectual and physical disabilities.  
39

40 Additionally, the socioeconomic status of individuals within these populations  
41 is typically lower than for members of the general population<sup>19,20</sup>. While  
42 prevalence rates of health conditions in a full country population for  
43 individuals with intellectual disabilities and individuals with autism have been  
44 compared to the general population in previous work using the Scotland  
45 Census 2011<sup>3,4,7</sup>, no such study has been conducted on the prevalence of  
46 health conditions for those with both intellectual disabilities and autism.  
47  
48  
49  
50  
51  
52  
53  
54  
55  
56  
57  
58  
59  
60

1  
2  
3 The management of care and treatment plans for individuals with multiple  
4 health conditions or disabilities presents significant challenges for health care  
5 practitioners. A review of 123 studies on care management for individuals with  
6 multiple chronic conditions in the USA reported that these patients access  
7 services more frequently and use a larger range of services than other patients,  
8 making the coordination of their care more difficult and often leading to  
9 suboptimal care<sup>21</sup>. Existing evidence also suggests that when individuals with  
10 intellectual disabilities have additional long-term conditions, these conditions  
11 are more poorly managed than for members of the general population with  
12 the same conditions<sup>22</sup>.  
13  
14  
15  
16  
17  
18  
19  
20  
21  
22  
23  
24  
25  
26

27 Given the frequent overlap of intellectual disabilities and autism, information  
28 on the associated co-existing conditions is important, to assist policy makers,  
29 planners, and practitioners to best adapt services for individuals with co-  
30 occurring intellectual disabilities and autism. This paper aims to investigate the  
31 prevalence of mental health conditions, sensory impairments, and physical  
32 disability in children, adults, and older adults with co-occurring intellectual  
33 disabilities and autism, compared with other people.  
34  
35  
36  
37  
38  
39  
40  
41  
42  
43

## 44 **Methods**

### 48 **Approval**

49 Approval was obtained from the Scottish Government to undertake secondary  
50 data analysis of Scotland's Census, 2011.  
51  
52  
53  
54  
55  
56  
57  
58  
59  
60

## Data Source

Scotland's Census provides information on Scotland's population every ten years, with the most recent Census on 27<sup>th</sup> March 2011.<sup>23</sup> The Census provides information on the number and characteristics of Scotland's population and households on the Census date.

It is a legal requirement to complete the census form and households were informed that failure to make a Census return, or supplying false information could result in a £1,000 fine. A very high response rate was achieved, with an estimated 94% of all of Scotland's population completing the Census. The Census team used a Census Coverage Survey with about 40,000 households, to estimate numbers and characteristics of the missing 6%.<sup>24</sup> The Coverage Survey and Census records were deterministically matched to check for duplicates. Individuals estimated to have been missed were then imputed using a subset of characteristics from real individuals. The edit and imputation methodology was adapted from the Office for National Statistics rigorous and systematic guidelines.<sup>24</sup>

The Census was completed by the head of each household on behalf of all occupants of the household. We consider it unlikely that people with co-occurring intellectual disabilities and autism completed the form, given the reading age required to do so. Rather, we expect that the people who completed the form on their behalf were parent-carers in family households, support workers for people living in supported accommodation, and the managers/key workers at communal establishments.



## Variables

The census included a question to identify people with intellectual disabilities and autism, as well as mental health conditions, sensory impairments, and physical disabilities: ‘Do you have any of the following conditions which have lasted, or are expected to last, at least 12 months? Tick all that apply’. There was a choice of ten possible responses to this question: deafness or partial hearing loss; blindness or partial sight loss; learning disability (for example, Down’s syndrome); learning difficulty (for example, dyslexia); developmental disorder (for example, Autistic Spectrum Disorder or Asperger’s Syndrome); physical disability; mental health condition; long-term illness, disease or condition; other condition. For “other condition” the option of providing more detail in an open text response was provided.

In Scotland, the term “learning disability” is used synonymously with that of “intellectual disabilities” used internationally. Importantly, the Census differentiated between intellectual disabilities and specific learning disabilities; and between intellectual disabilities and autism.

During the methodology development for Scotland’s Census, 2011, cognitive question testing was undertaken on the questions on long-term health conditions and disabilities. This was to determine whether the questions were answered accurately, and to identify any changes needed to improve data quality and/or the acceptability of the way questions were phrased. Cognitive interviewing is a widely used approach to critically evaluate and improve survey questionnaires.<sup>25</sup> This approach enables researchers to modify survey material to enhance clarity. Retrospective probing was conducted with 102 participants with a variety of sex, age, and health conditions and disabilities

1  
2  
3 (including people with more than one of the conditions). They included people  
4 with autism, intellectual disabilities, dyslexia, dyspraxia, speech impairment,  
5 mental health conditions (both milder and more serious), and other long-term  
6 conditions.<sup>23</sup> Using the cognitive interviewing results, the question aimed to  
7 detect autism was improved and rephrased, to better capture this information.  
8 The questions on intellectual disability, mental health condition, visual  
9 impairment, hearing impairment, and physical disability did not require any  
10 modifications<sup>26</sup>.

11  
12  
13  
14  
15  
16  
17  
18  
19  
20  
21  
22 The Census team imputed answers for the 14.7% who did not tick any of the  
23 boxes in question on long-term conditions, based on their free text answers for  
24 this question and answers to other health questions in the Census, which  
25 increased the completion rate to 97.4%. For the remaining 2.6%, the Census  
26 team assumed the most plausible explanation was that the person had no  
27 long-term condition but did not see the “No condition” check box at the end of  
28 the question, and hence recorded them as having no conditions.  
29  
30  
31  
32  
33  
34  
35  
36  
37  
38  
39  
40  
41

## 42 **Data Analysis**

43  
44 We calculated the number and rate per 1,000 population of children and  
45 adults with co-occurring intellectual disabilities and autism. We then calculated  
46 the number and percentage of people with mental health conditions, deafness  
47 or partial hearing loss, blindness or partial sight loss, and physical disability, for  
48 those with co-occurring intellectual disabilities and autism, compared with  
49 individuals who do not have co-occurring intellectual disabilities and autism  
50 using chi-squared ( $\chi^2$ ) tests. For the whole population we then used logistic  
51 regression to calculate the odds ratios (OR: 95% confidence interval, 95% CI) of  
52  
53  
54  
55  
56  
57  
58  
59  
60

1  
2  
3 co-occurring intellectual disabilities and autism statistically predicting the  
4 binary response of having each of the four specific types of long-term health  
5 conditions, adjusted for age and sex. Sex was binary, with males being the  
6 reference group. Age was categorised into groups: 0-15, 16-24, 25-34, 35-44,  
7 45-54, 55-64, 65-74, 75+, with 0-15 years as the reference group. We repeated  
8 the regressions, including the interaction term of age x co-occurring  
9 intellectual disabilities and autism, as people with the most severe disabilities  
10 die earlier, which may affect the profile of additional health problems  
11 differently to that seen in the general population. The same reference groups  
12 were used. All analysis was conducted using SPSS software version 22.  
13  
14  
15  
16  
17  
18  
19  
20  
21  
22  
23  
24  
25  
26

### 27 **Patient and Public Involvement**

28 The Scottish Learning Disabilities Observatory, where this research was  
29 undertaken, has a specific remit for people with intellectual disabilities and  
30 people with autism. Its steering group includes partners from third sector  
31 organisations and experts by experience, who approved the workplan for this  
32 project prior to it commencing. Results from this study will be disseminated for  
33 people with intellectual disabilities and autism in an easy-read version via the  
34 Scottish Learning Disabilities Observatory website, newsletters, and  
35 conference.  
36  
37  
38  
39  
40  
41  
42  
43  
44  
45  
46  
47

### 48 **Results**

#### 49 **Characteristics of the Sample**

50 Scotland's Census, 2011, includes records on 5,295,403 people aged 0-75+  
51 years. 5,709/5,295,403 (1.08/1,000) people had co-occurring intellectual  
52 disabilities and autism; of whom 3,769 (66.0%) were male and 1,940 (44.0%)  
53  
54  
55  
56  
57  
58  
59  
60

1  
2  
3 were female. Overall, 2,362/916,331 (2.58/1,000) of the total population of  
4 children (0-15 years), and 3,347/4,379,072 (0.76/1,000) adults (16-75+ years)  
5 had co-occurring intellectual disabilities and autism.  
6  
7  
8

9  
10  
11 Compared with the population who did not have co-occurring intellectual  
12 disabilities and autism, the population with co-occurring intellectual disabilities  
13 and autism had more males (66.0% versus 48.5%;  $\chi^2=703.5$ ;  $df=1$ ;  $p<0.001$ );  
14 were younger ( $\chi^2=3894.7$ ;  $df=7$ ;  $p<0.001$ ); were more likely to have been born  
15 in the UK rather than elsewhere ( $\chi^2=101.9$ ;  $df=1$ ;  $p<0.001$ ), revealing lesser  
16 geographic mobility; and were no different with regards to Caucasian versus  
17 non-Caucasian ethnicity ( $\chi^2=1.1$ ;  $df=1$ ;  $p=0.3$ ) (table 1).  
18  
19  
20  
21  
22  
23  
24  
25  
26  
27  
28

29 - Insert table 1 about here -  
30  
31  
32

### 33 **Long-term Health Conditions**

34 Table 2 shows the proportion of people with co-occurring intellectual  
35 disabilities and autism, who had each of the four additional long-term health  
36 conditions, compared to people who did not have co-occurring intellectual  
37 disabilities and autism. Some people in the sample had more than one long-  
38 term health condition.  
39  
40  
41  
42  
43  
44  
45  
46  
47

48 - Insert table 2 about here -  
49  
50  
51

### 52 *Mental Health Condition*

53  
54 Adjusting for age and sex, given the different distributions compared with the  
55 general population, having co-occurring intellectual disabilities and autism had  
56 an OR=25.55 (23.93-27.28, 95% CI) in predicting mental health conditions  
57  
58  
59  
60

1  
2  
3 (table 3). When the interaction term was added (age x co-occurring intellectual  
4 disabilities and autism), co-occurring intellectual disabilities and autism had an  
5 OR=130.80 (117.13-146.07, 95% CI) in predicting a mental health condition  
6  
7  
8  
9 (table 3).  
10

11  
12  
13  
14 - Insert table 3 about here -  
15

### 16 17 18 *Blindness or partial sight loss*

19  
20 Adjusting for age and sex, having co-occurring intellectual disabilities and  
21 autism had an OR=36.78 (34.21-39.54, 95% CI) in predicting blindness or partial  
22 sight loss (table 4). When the interaction term was added (age x co-occurring  
23 intellectual disabilities and autism), co-occurring intellectual disabilities and  
24 autism had an OR=65.90 (58.74-73.92, 95% CI) in predicting blindness or partial  
25 sight loss (table 4).  
26  
27  
28  
29  
30  
31  
32

33  
34  
35 - Insert table 4 about here -  
36  
37

### 38 39 *Deafness or partial hearing loss*

40  
41 Adjusting for age and sex, having co-occurring intellectual disabilities and  
42 autism had an OR=11.33 (10.43-12.31, 95% CI) in predicting deafness or partial  
43 hearing loss (table 5). When the interaction term was added (age x co-  
44 occurring intellectual disabilities and autism), co-occurring intellectual  
45 disabilities and autism had an OR=22.00 (19.20-25.21, 95% CI) in predicting  
46 deafness or partial hearing loss (table 5).  
47  
48  
49  
50  
51  
52  
53

54  
55  
56 - Insert table 5 about here -  
57  
58  
59  
60

### *Physical disability*

Adjusting for age and sex, having co-occurring intellectual disabilities and autism had an OR=61.16 (57.60-64.94, 95% CI) in predicting physical disability (table 6). When the interaction term was added (age x co-occurring intellectual disabilities and autism), co-occurring intellectual disabilities and autism had an OR=157.54 (144.58-171.66, 95% CI) in predicting physical disability (table 6).

- Insert table 6 about here -

## **Discussion**

### **Principle findings**

Mental health conditions, blindness or partial sight loss, deafness or partial hearing loss, and physical disability were all significantly more common in people with co-occurring intellectual disabilities and autism than people without these co-occurring conditions. The odds ratios after adjusting for age and sex and the interaction term, were substantial, being 131, 66, 22, and 158 respectively. This is important as each of these conditions are disabling and can significantly impact an individual's quality of life. They contribute to high rates of multi-morbidity, which, on top of communication and cognitive problems due to autism and intellectual disabilities, renders assessments, diagnosis, and treatment of additional health problems more complex than for other people.

Across all age groups, blindness, deafness, and physical disability were more common in females than males with co-occurring intellectual disabilities and autism, unlike the gender ratios in people without co-occurring intellectual disabilities and autism. Mental health conditions were more common in males

1  
2  
3 than females with co-occurring intellectual disabilities and autism, except for  
4 the 65+ year group, contrary to the gender ratios in other people. All  
5  
6 conditions were more prevalent with increasing age in the people with co-  
7  
8 occurring intellectual disabilities and autism, except for physical disability  
9  
10 which was more common in the children/youth and older people than in the  
11  
12  
13  
14 adults.  
15  
16  
17

### 18 **Comparison with existing literature**

19  
20 The prevalence of these additional long-term health conditions has seldom  
21  
22 been investigated in people with co-occurring intellectual disabilities and  
23  
24 autism, particularly in comparison with other people, and never, to our  
25  
26 knowledge, as a total population study. All of the long-term health conditions  
27  
28 were more common than in those without co-occurring intellectual disabilities  
29  
30 and autism.  
31  
32  
33  
34

35  
36 Smaller, less representative studies have reported a higher rate of mental  
37  
38 health conditions in adults and youth with co-occurring intellectual disabilities  
39  
40 and autism compared with those with intellectual disabilities and without  
41  
42 autism,<sup>9-13</sup> but not all.<sup>14</sup> People with autism have been reported to have more  
43  
44 mental health conditions than other people (OR=9 in adults and OR=16 in  
45  
46 children),<sup>6,7</sup> as have people with intellectual disabilities compared with other  
47  
48 people (OR=7),<sup>3</sup> using the same Scotland's Census, 2011 data as in this current  
49  
50 paper, whereas the comparable ratio we now report for people with co-  
51  
52 occurring intellectual disabilities and autism for mental health conditions was  
53  
54 OR=26. Having the co-occurring conditions therefore presents a much higher  
55  
56 risk of mental health conditions than either intellectual disabilities or autism  
57  
58 on their own.  
59  
60

1  
2  
3  
4  
5  
6 The previous small study of youth reported lower rates of visual and hearing  
7 impairments in those with co-occurring intellectual disabilities and autism  
8 (38.9% and 13.9%) compared with those with intellectual disabilities but  
9 without autism (50% and 19.4%).<sup>12</sup> This was in contrast with the larger study  
10 reporting more autistic symptoms in adults with intellectual disabilities and  
11 visual impairments than in adults with intellectual disabilities but without  
12 visual impairments.<sup>16</sup> Adults with autism have been reported to have more  
13 blindness or partial sight loss, and deafness or partial hearing loss than other  
14 people (12.1% and 17.5%),<sup>6</sup> as have children with autism (3.5% and 2.9%),<sup>7</sup> and  
15 people (children and adults combined) with intellectual disabilities compared  
16 with other people (13.1% and 12.4%),<sup>3</sup> using the same data from Scotland's  
17 Census 2011 as in this current paper. This current study found the comparable  
18 rates for people with co-occurring intellectual disabilities and autism for  
19 blindness or partial sight loss, and deafness or partial hearing loss was 21.7%  
20 and 19.3% for adults, and 16.6% and 10.3% for children. Having the co-  
21 occurring conditions of intellectual disabilities and autism therefore presents a  
22 much higher risk of sensory impairments than for children and adults with  
23 autism, and for people with intellectual disabilities (although children were not  
24 separately studied in the previous report).

25  
26  
27  
28  
29  
30  
31  
32  
33  
34  
35  
36  
37  
38  
39  
40  
41  
42  
43  
44  
45  
46  
47  
48 Regarding physical disability, 32.6% of people with intellectual disabilities were  
49 previously reported to have physical disability using the same dataset as the  
50 current study.<sup>3</sup> Of people with autism, 24.0% of adults and 10.7% of children  
51 reported physical disability in this dataset.<sup>6,7</sup> These rates are lower than those  
52 we report in this current study of people with co-occurring intellectual  
53 disabilities and autism – 45.6% of children and 42.2% of adults.



## Strengths and limitations

Strengths of the study include its large scale and general population comparison group, whole population coverage and very high response rate so the results are representative of the whole population. Intellectual disabilities, autism, and the long-term health conditions were enquired about systematically for everyone in the population. We believe the results are therefore generalisable to other high-income countries. The cognitive question testing during the design of the Census is a further strength. The Census had clear categories to distinguish between intellectual disabilities, specific learning disability (like dyslexia), and autism.

Limitations include the proxy-reporting, which may, or may not reflect self-reports. However, without proxy-reports, we would have no information on people unable to self-report due to their disabilities, and a previous review on the topic concluded that overall, proxy reports are a useful addition to determine aspects of well-being in people with intellectual disabilities.<sup>27</sup>

Additionally, people were reported who were known to have autism/Asperger's syndrome, intellectual disabilities, and the additional long-term health conditions, rather than detailed individual research assessments being undertaken which are clearly not possible in such large population studies, and may therefore be subject to a degree of error which we were not able to check. Individuals who were known to have intellectual disabilities and autism are higher health care users and so are more likely to receive a diagnosis for other health care conditions than members of the general population who do not access health care services as frequently. It is also important to note that the Scotland Census 2011 was administered 8 years

ago, and so any potential changes in prevalence rates of the conditions investigated in this paper are not captured by this analysis.

## Implications

There is a greater than double disadvantage for people with co-occurring intellectual disabilities and autism, in terms of additional long-term health conditions. We found that, and quantified the extent to which mental health conditions, sensory impairments, and physical disabilities are more common than in people without co-occurring intellectual disabilities and autism, and in people with just intellectual disabilities or just autism. This may well impact on quality of life. It raises challenges for staff working with people with these co-occurring conditions in view of the additional complexity in assessments, diagnoses, and interventions, as sensory impairments and mental health conditions in particular, interact with the persons pre-existing communication and cognitive problems in this context. Therefore, it is important that these co-occurring conditions are planned for with staff being trained, equipped, resourced and prepared to address the challenge.

## References

1. Cooper S-A, McLean G, Guthrie B, McConnachie A, Mercer S, Sullivan F, Morrison. J. Multiple physical and mental health comorbidity in adults with intellectual disabilities: population-based cross-sectional analysis. *BMC Family Practice* 2015; 16: 110.
2. Hughes-McCormack LA, Rydzewska E, Henderson A., Rintoul J, Macintyre C, Cooper S-A. Prevalence and general health status of people with intellectual disabilities in Scotland -a total population study. *J Epidemiol Community Health* 2018; 72: 78–85.

- 1  
2  
3  
4  
5  
6  
7  
8  
9  
10  
11  
12  
13  
14  
15  
16  
17  
18  
19  
20  
21  
22  
23  
24  
25  
26  
27  
28  
29  
30  
31  
32  
33  
34  
35  
36  
37  
38  
39  
40  
41  
42  
43  
44  
45  
46  
47  
48  
49  
50  
51  
52  
53  
54  
55  
56  
57  
58  
59  
60
3. Hughes-McCormack LA, Rydzewska E, Henderson A, Rintoul J, Macintyre C, Cooper S-A. Prevalence of mental ill-health and relationship with physical health in a whole country population of 26,349 people with intellectual disabilities, compared with the general population. *Br J Psychiatry Open*, 2017; 3: 243-248.
4. Kinnear D, Morrison J, Allan L, Henderson A, Smiley E, & Cooper S-A. Prevalence of physical conditions and multimorbidity in a cohort of adults with intellectual disabilities with and without Down syndrome: cross-sectional study. *BMJ Open* 2018; 8:e018292.
5. Croen LA, Zerbo O, Qian Y, Massolo ML, Rich S, Sidney S, Kripke C. The health status of adults on the autism spectrum. *Autism* 2015; 19:814–823.
6. Rydzewska E, Hughes-McCormack LA, Gillberg C, Henderson A, MacIntyre C, Rintoul J, & Cooper S-A. Prevalence of long-term health conditions in adults with autism: observational study of a whole country population. *BMJ Open* 2018a; 8(8): e023945.
7. Rydzewska E, Hughes-McCormack LA, Gillberg C, Henderson A, MacIntyre C, Rintoul J, Cooper S-A. Prevalence of sensory impairments, physical and intellectual disabilities, and mental health in children and young people with self/proxy-reported autism - observational study of a whole country population. *Autism* 2018; 23:1201-9.
8. Dunn K, Rydzewska E, Macintyre C, Rintoul J, & Cooper S-A. The prevalence and general health status of people with intellectual disabilities and autism co-occurring together: a total population study. *J Intellectual Disabilit Res* 2018, 63: 277-285.
9. Cervantes PE, Matson JL. Comorbid symptomology in adults with autism spectrum disorder and intellectual disability. *J Autism Dev Disord* 2015; 45(12): 3961-3970.

10. Bakken TL, Helverschou SB, Eilertsen DE, Heggelund T, Myrbakk E, & Martinsen, H. Psychiatric disorders in adolescents and adults with autism and intellectual disability: A representative study in one county in Norway. *Res Dev Disabil* 2010; 31: 1669-1677.
11. Tsakanikos E, Sturmey P, Costello H, Holt G, Bouras N. Referral trends in mental health services for adults with intellectual disability and autism spectrum disorders. *Autism* 2007;11:9-17.
12. Bradley E, Bolton P. Episodic psychiatric disorders in teenagers with learning disabilities with and without autism. *Br J Psychiatr* 2006; 189:361-6.
13. Hill J, Furniss F. Patterns of emotional and behavioural disturbance associated with autistic traits in young people with severe intellectual disabilities and challenging behaviours. *Res Dev Disabil* 2006; 27:517-28.
14. Melville CA, Cooper S-A, Morrison J, Smiley E, Allan L, Jackson A, Finlayson J, Mantry D. The prevalence and incidence of mental ill-health in adults with autism and intellectual disabilities. *J Autism Dev Disord* 2008; 38:1676-88.
15. Bishop-Fitzpatrick L, Rubenstein E. The physical and mental health of middle aged and older adults on the autism spectrum and the impact of intellectual disability. *Research in Autism Spectrum Disorders*. 2019b Jul 1; 63:34-41.
16. Kiani, R, Bhaumik, S, Tyrer, F, Bankart, J, Miller, H, Cooper, S-A, Brugha, T. The relationship between autism spectrum disorder and visual impairments among adults with intellectual disability. *Autism Res* 2019; 12:1411-1422.
17. Evenhuis, H., Henderson, C.M., Beange, H., Lennox, N. and Chicoine, B., 2001. Healthy ageing—adults with intellectual disabilities: physical health issues. *Journal of Applied Research in Intellectual Disabilities*, 14(3), pp.175-194.
18. Heslop, P., Blair, P. S., Fleming, P., Hoghton, M., Marriott, A., & Russ, L. 2014. The Confidential Inquiry into premature deaths of people with

- 1  
2  
3 intellectual disabilities in the UK: a population-based study. *The Lancet*, 383  
4 (9920), pp. 889-895.  
5  
6  
7  
8 19. Shifrer D, Muller C, Callahan R. Disproportionality and learning disabilities:  
9 Parsing apart race, socioeconomic status, and language. *Journal of learning*  
10 *disabilities*. 2011 May;44(3):246-57.  
11  
12  
13  
14 20. Emerson E. Poverty and people with intellectual disabilities. *Mental*  
15 *retardation and developmental disabilities research reviews*.  
16 2007;13(2):107-13.  
17  
18  
19  
20 21. Vogeli C, Shields AE, Lee TA, Gibson TB, Marder WD, Weiss KB, Blumenthal  
21 D. Multiple chronic conditions: prevalence, health consequences, and  
22 implications for quality, care management, and costs. *Journal of general*  
23 *internal medicine*. 2007 Dec 1;22(3):391-5.  
24  
25  
26  
27  
28  
29 22. Cooper SA, Hughes-McCormack L, Greenlaw N, McConnachie A, Allan L,  
30 Baltzer M, McArthur L, Henderson A, Melville C, McSkimming P, Morrison J.  
31 Management and prevalence of long-term conditions in primary health care  
32 for adults with intellectual disabilities compared with the general  
33 population: A population-based cohort study. *Journal of Applied Research*  
34 *in Intellectual Disabilities*. 2018 Jan;31:68-81.  
35  
36  
37  
38  
39  
40  
41  
42 23. National Records of Scotland. Scotland's Census, 2011. Supporting  
43 information. *National Records of Scotland*. 2011  
44 <http://www.scotlandscensus.gov.uk/supporting-information>.  
45  
46  
47  
48 24. Office for National Statistics. Survey Methodology Bulletin No. 69 –  
49 September 2011. 2011 [https://](https://webarchive.nationalarchives.gov.uk/20160108193745/http://www.ons.gov.uk/guide-method/method-quality/survey-methodologybulletin/smb-69/index.html)  
50 [webarchive.nationalarchives.gov.uk/20160108193745/http://www.](https://webarchive.nationalarchives.gov.uk/20160108193745/http://www.ons.gov.uk/guide-method/method-quality/survey-methodologybulletin/smb-69/index.html)  
51 [ons.gov.uk/guide-method/method-quality/survey-](https://webarchive.nationalarchives.gov.uk/20160108193745/http://www.ons.gov.uk/guide-method/method-quality/survey-methodologybulletin/smb-69/index.html)  
52 [methodologybulletin/smb-69/index.html](https://webarchive.nationalarchives.gov.uk/20160108193745/http://www.ons.gov.uk/guide-method/method-quality/survey-methodologybulletin/smb-69/index.html).  
53  
54  
55  
56  
57  
58  
59  
60

1  
2  
3 25. Willis GB. Cognitive interviewing: A tool for improving questionnaire design.  
4 Sage Publications; 2004.  
5

6  
7 26. General Register Office for Scotland. 2011 Census Question Testing- The  
8 Health and Disability Questions (2009). 2009  
9  
10 [https://www.scotlandscensus.gov.uk/documents/research/2011-census-](https://www.scotlandscensus.gov.uk/documents/research/2011-census-healthdisability-questions.pdf)  
11 [healthdisability-questions.pdf](https://www.scotlandscensus.gov.uk/documents/research/2011-census-healthdisability-questions.pdf).  
12  
13  
14

15  
16 27. Perkins EA, Berkman KA. Into the unknown: Aging with autism spectrum  
17 disorders. *Am J Intellect Dev Disabil* 2012; 117:478-96.  
18  
19

## 20 21 22 23 **Funding**

24  
25  
26  
27 This work was supported by the UK Medical Research Council, grant number: MC\_PC\_1717), and the  
28 Scottish Government via the Scottish Learning Disabilities Observatory.  
29

30  
31  
32  
33 The study sponsor and funders had no role in the study design; in the  
34 collection, analysis, and interpretation of data; in the writing of the report; and  
35 in the decision to submit the article for publication.  
36  
37  
38

39  
40  
41 The researchers are independent from the funders.  
42  
43  
44

## 45 46 **Competing interests**

47  
48  
49 The authors declare no competing interests.  
50  
51  
52

## 53 54 **Author's contributions**

1  
2  
3 KD analysed and interpreted the data, and wrote the first draft of the  
4 manuscript. ER contributed to data access, data interpretation, and drafting  
5 the manuscript. MF provided advice on response to reviewer comments  
6 regarding choice of statistical methods and contributed to the writing of the  
7 manuscript. S-AC conceived and managed the project, interpreted data, and  
8 contributed to writing the manuscript. All approved the final version of the  
9 manuscript. S-AC is the study guarantor.  
10  
11  
12  
13  
14  
15  
16  
17  
18  
19

## 20 **Data sharing**

21  
22  
23  
24  
25 Data is available via National Records of Scotland, following project approval.

26  
27 Data are available at the following link

28  
29 [https://www.scotlandscensus.gov.uk/ods-web/data-](https://www.scotlandscensus.gov.uk/ods-web/data-warehouse.html#additionaltab)  
30 [warehouse.html#additionaltab](https://www.scotlandscensus.gov.uk/ods-web/data-warehouse.html#additionaltab)  
31  
32  
33  
34  
35  
36  
37

## 38 **Acknowledgments**

39  
40  
41  
42 We thank the National Records of Scotland Census team, and the Scottish  
43 population who completed the Census.  
44  
45  
46  
47  
48  
49  
50  
51  
52  
53  
54  
55  
56  
57  
58  
59  
60

Table 1: Characteristics of people with and without, co-occurring intellectual disabilities and autism

|                                | <b>People without co-occurring intellectual disabilities and autism</b><br>N=5,289,694 (100%)<br>Number (%) | <b>People with co-occurring intellectual disabilities and autism</b><br>N=5,709 (100%)<br>Number (%) |
|--------------------------------|-------------------------------------------------------------------------------------------------------------|------------------------------------------------------------------------------------------------------|
| <b>Gender*</b>                 |                                                                                                             |                                                                                                      |
| Males                          | 2,563,675 (48.5%)                                                                                           | 3,769 (66.0%)                                                                                        |
| Females                        | 2,726,019 (51.5%)                                                                                           | 1,940 (44.0%)                                                                                        |
| <b>Age groups*</b>             |                                                                                                             |                                                                                                      |
| 0-15                           | 913,969 (17.3%)                                                                                             | 2,362 (41.4%)                                                                                        |
| 16-24                          | 631,094 (11.9%)                                                                                             | 1,394 (24.4%)                                                                                        |
| 25-34                          | 666,725 (12.6%)                                                                                             | 602 (10.5%)                                                                                          |
| 35-44                          | 734,304 (13.9%)                                                                                             | 450 (7.9%)                                                                                           |
| 45-54                          | 786,355 (14.9%)                                                                                             | 401 (7.0%)                                                                                           |
| 55-64                          | 667,157 (12.6%)                                                                                             | 256 (4.5%)                                                                                           |
| 65+                            | 890,090 (16.8%)                                                                                             | 244 (4.3%)                                                                                           |
| <b>Country of birth*</b>       |                                                                                                             |                                                                                                      |
| UK                             | 4,920,614 (93.0%)                                                                                           | 5,505 (96.4%)                                                                                        |
| Other Europe                   | 172,160 (3.3%)                                                                                              | 83 (1.5%)                                                                                            |
| Africa                         | 46,708 (0.9%)                                                                                               | 34 (0.6%)                                                                                            |
| Middle East and Asia           | 104,480 (2.0%)                                                                                              | 50 (0.9%)                                                                                            |
| The Americas and the Caribbean | 33,325 (0.6%)                                                                                               | 28 (0.5%)                                                                                            |
| Other                          | 12,407 (0.2%)                                                                                               | 9 (0.2%)                                                                                             |
| <b>Ethnicity</b>               |                                                                                                             |                                                                                                      |
| White                          | 5,078,910 (96.0%)                                                                                           | 5,497 (96.3%)                                                                                        |
| Asian                          | 140,542 (2.7%)                                                                                              | 136 (2.4%)                                                                                           |
| Mixed/multiple ethnicities     | 19,775 (0.4%)                                                                                               | 40 (0.7%)                                                                                            |



|                     |               |           |
|---------------------|---------------|-----------|
| African             | 29,615 (0.6%) | 23 (0.4%) |
| Caribbean or black  | 6,536 (0.1%)  | 4 (0.1%)  |
| Other ethnic groups | 14,316 (0.3%) | 9 (0.2%)  |

\*People with co-occurring intellectual disabilities and autism versus people without co-occurring intellectual disabilities and autism;  $p < 0.01$

For peer review only

Table 2: Prevalence of conditions in people with and without co-occurring intellectual disabilities and autism by age and sex

| People with co-occurring intellectual disabilities and autism    |                                         |                          |                               |                                    |                             |                                 |                                      |                           |                               |
|------------------------------------------------------------------|-----------------------------------------|--------------------------|-------------------------------|------------------------------------|-----------------------------|---------------------------------|--------------------------------------|---------------------------|-------------------------------|
| Condition                                                        | Children/youth, 0-15 years<br>N=2,362   |                          |                               | Adults, 16-64 years<br>N=3,103     |                             |                                 | Older people, 65+ years<br>N=244     |                           |                               |
|                                                                  | M<br>N=1,563<br>(100%)                  | F<br>N=799<br>(100%)     | Total<br>N=2,362<br>(100%)    | M<br>N= 2,073<br>(100%)            | F<br>N= 1,030<br>(100%)     | Total<br>N= 3,103<br>(100%)     | M<br>N= 133<br>(100%)                | F<br>N= 111<br>(100%)     | Total<br>N= 244<br>(100%)     |
| <b>Mental health condition</b>                                   | 328<br>(21.0%)                          | 152<br>(19.0%)           | 480<br>(20.3%)                | 768<br>(37.0%)                     | 377<br>(36.6%)              | 1145<br>(36.9%)                 | 80<br>(60.2%)                        | 80<br>(72.1%)             | 160<br>(65.6%)                |
| <b>Blindness/partial sight loss</b>                              | 214<br>(13.7%)                          | 177<br>(22.2%)           | 391<br>(16.6%)                | 355<br>(17.1%)                     | 220<br>(21.4%)              | 575<br>(18.5%)                  | 71<br>(53.3%)                        | 80<br>(72.1%)             | 151<br>(61.9%)                |
| <b>Deafness/partial hearing loss</b>                             | 148<br>(9.5%)                           | 95<br>(11.9%)            | 243<br>(10.3%)                | 301<br>(14.5%)                     | 190<br>(18.4%)              | 491<br>(15.8%)                  | 73<br>(54.9%)                        | 81<br>(73.0%)             | 154<br>(63.1%)                |
| <b>Physical disability</b>                                       | 618<br>(39.5%)                          | 458<br>(57.3%)           | 1,076<br>(45.6%)              | 719<br>(34.7%)                     | 508<br>(49.3%)              | 1,227<br>(39.5%)                | 86<br>(64.7%)                        | 99<br>(89.2%)             | 185<br>(75.8%)                |
| People without co-occurring intellectual disabilities and autism |                                         |                          |                               |                                    |                             |                                 |                                      |                           |                               |
| Condition                                                        | Children/youth, 0-15 years<br>N=913,969 |                          |                               | Adults, 16-64 years<br>N=3,485,635 |                             |                                 | Older people, 65+ years<br>N=890,090 |                           |                               |
|                                                                  | M<br>N=467,543<br>(100%)                | F<br>N=446,426<br>(100%) | Total<br>N= 913,969<br>(100%) | M<br>N= 1,712,526<br>(100%)        | F<br>N= 1,773,109<br>(100%) | Total<br>N= 3,485,635<br>(100%) | M<br>N= 383,606<br>(100%)            | F<br>N= 506,484<br>(100%) | Total<br>N= 890,090<br>(100%) |
| <b>Mental health condition</b>                                   | 1,861<br>(0.4%)                         | 980<br>(0.2%)            | 2,841<br>(0.3%)               | 92,308<br>(5.4%)                   | 95,108<br>(5.4%)            | 187,416<br>(5.4%)               | 14,760<br>(3.8%)                     | 26,141<br>(5.2%)          | 40,901<br>(4.6%)              |
| <b>Blindness/partial sight loss</b>                              | 1,793<br>(0.4%)                         | 1,439<br>(0.3%)          | 3,232<br>(0.4%)               | 24,129<br>(1.4%)                   | 16,954<br>(1.0%)            | 41,083<br>(1.2%)                | 30,389<br>(7.9%)                     | 49,839<br>(9.8%)          | 80,228<br>(9.0%)              |
| <b>Deafness/partial hearing loss</b>                             | 2,731<br>(0.6%)                         | 2,225<br>(0.5%)          | 4,956<br>(0.5%)               | 70,543<br>(4.1%)                   | 48,727<br>(2.7%)            | 119,270<br>(3.4%)               | 111,447<br>(29.1%)                   | 114,393<br>(22.6%)        | 225,840<br>(25.4%)            |
| <b>Physical disability</b>                                       | 3,637<br>(0.8%)                         | 2,799<br>(0.6%)          | 6,436<br>(0.7%)               | 81,655<br>(4.8%)                   | 82,968<br>(4.7%)            | 164,623<br>(4.7%)               | 73,759<br>(19.2%)                    | 109,103<br>(21.5%)        | 182,862<br>(20.5%)            |

Table 3: Independent predictors of mental health conditions in the whole population

| Characteristic                                    |                                                   | Regression 1 |                         | Regression 2 (including the interaction term: age x co-occurring intellectual disabilities and autism) |                         |
|---------------------------------------------------|---------------------------------------------------|--------------|-------------------------|--------------------------------------------------------------------------------------------------------|-------------------------|
|                                                   |                                                   | Odds ratio   | 95% confidence interval | Odds ratio                                                                                             | 95% confidence interval |
| Co-occurring intellectual disabilities and autism | Not present (reference)                           | -            | -                       | -                                                                                                      | -                       |
|                                                   | Co-occurring intellectual disabilities and autism | 25.55        | 23.93-27.28             | 130.80                                                                                                 | 117.13-146.07           |
| Gender                                            | Male (reference)                                  | -            | -                       | -                                                                                                      | -                       |
|                                                   | Female                                            | 1.28         | 1.26-1.29               | 1.28                                                                                                   | 1.26-1.29               |
| Sex                                               | 0-15 (reference)                                  | -            | -                       | -                                                                                                      | -                       |
|                                                   | 16-24                                             | 9.45         | 9.04-9.88               | 11.32                                                                                                  | 10.78-11.89             |
|                                                   | 25-34                                             | 21.17        | 20.29-22.09             | 25.31                                                                                                  | 24.13-26.53             |
|                                                   | 35-44                                             | 29.73        | 28.50-31.00             | 35.49                                                                                                  | 33.87-37.20             |
|                                                   | 45-54                                             | 29.19        | 27.98-30.44             | 34.84                                                                                                  | 33.24-36.51             |
|                                                   | 55-64                                             | 22.63        | 21.63-23.62             | 27.00                                                                                                  | 25.75-28.30             |
|                                                   | 65+                                               | 19.320       | 18.52-20.16             | 23.00                                                                                                  | 21.95-24.12             |
| Age x both intellectual disabilities and autism   | 0-15 (reference)                                  | -            | -                       | -                                                                                                      | -                       |
|                                                   | 16-24                                             | -            | -                       | 0.15                                                                                                   | 0.13-0.18               |
|                                                   | 25-34                                             | -            | -                       | 0.10                                                                                                   | 0.08-0.12               |
|                                                   | 35-44                                             | -            | -                       | 0.08                                                                                                   | 0.07-0.10               |
|                                                   | 45-54                                             | -            | -                       | 0.09                                                                                                   | 0.07-0.11               |
|                                                   | 55-64                                             | -            | -                       | 0.12                                                                                                   | 0.09-0.15               |
|                                                   | 65+                                               | -            | -                       | 0.31                                                                                                   | 0.24-0.42               |
| Constant                                          | -                                                 | 0.00         | -                       | 0.00                                                                                                   | -                       |

Table 4: Independent predictors of blindness/partial sight loss in the whole population

| Characteristic                                    |                                                   | Regression 1 |                         | Regression 2 (including the interaction term: age x co-occurring intellectual disabilities and autism) |                         |
|---------------------------------------------------|---------------------------------------------------|--------------|-------------------------|--------------------------------------------------------------------------------------------------------|-------------------------|
|                                                   |                                                   | Odds ratio   | 95% confidence interval | Odds ratio                                                                                             | 95% confidence interval |
| Co-occurring intellectual disabilities and autism | Not present (reference)                           | -            | -                       | -                                                                                                      | -                       |
|                                                   | Co-occurring intellectual disabilities and autism | 36.78        | 34.21-39.54             | 65.90                                                                                                  | 58.74-73.92             |
| Sex                                               | Male (reference)                                  | -            | -                       | -                                                                                                      | -                       |
|                                                   | Female                                            | 1.01         | 1.00-1.02               | 1.01                                                                                                   | 1.00-1.02               |
| Age                                               | 0-15 (reference)                                  | -            | -                       | -                                                                                                      | -                       |
|                                                   | 16-24                                             | 1.56         | 1.48-1.64               | 1.66                                                                                                   | 1.58-1.75               |
|                                                   | 25-34                                             | 1.82         | 1.74-1.91               | 1.91                                                                                                   | 1.82-2.01               |
|                                                   | 35-44                                             | 2.55         | 2.44-2.66               | 2.69                                                                                                   | 2.57-2.81               |
|                                                   | 45-54                                             | 4.42         | 4.24-4.60               | 4.67                                                                                                   | 4.48-4.87               |
|                                                   | 55-64                                             | 7.50         | 7.22-7.80               | 7.93                                                                                                   | 7.61-8.26               |
|                                                   | 65+                                               | 31.06        | 29.95-32.22             | 32.75                                                                                                  | 31.51-34.04             |
| Age x both intellectual disabilities and autism   | 0-15 (reference)                                  | -            | -                       | -                                                                                                      | -                       |
|                                                   | 16-24                                             | -            | -                       | 0.43                                                                                                   | 0.35-0.53               |
|                                                   | 25-34                                             | -            | -                       | 0.67                                                                                                   | 0.52-0.84               |
|                                                   | 35-44                                             | -            | -                       | 0.53                                                                                                   | 0.41-0.68               |
|                                                   | 45-54                                             | -            | -                       | 0.37                                                                                                   | 0.29-0.47               |
|                                                   | 55-64                                             | -            | -                       | 0.28                                                                                                   | 0.21-0.37               |
|                                                   | 65+                                               | -            | -                       | 0.25                                                                                                   | 0.19-0.33               |
| Constant                                          | -                                                 | 0.00         | -                       | 0.00                                                                                                   | -                       |

Table 5: Independent predictors of deafness/partial hearing loss in the whole population

| Characteristic                                    |                                                   | Regression 1 |                         | Regression 2 (including the interaction term: age x co-occurring intellectual disabilities and autism) |                         |
|---------------------------------------------------|---------------------------------------------------|--------------|-------------------------|--------------------------------------------------------------------------------------------------------|-------------------------|
|                                                   |                                                   | Odds ratio   | 95% confidence interval | Odds ratio                                                                                             | 95% confidence interval |
| Co-occurring intellectual disabilities and autism | Not present (reference)                           | -            | -                       | -                                                                                                      | -                       |
|                                                   | Co-occurring intellectual disabilities and autism | 11.33        | 10.43-12.31             | 22.00                                                                                                  | 19.20-25.21             |
| Gender                                            | Male (reference)                                  | -            | -                       | -                                                                                                      | -                       |
|                                                   | Female                                            | 0.69         | 0.68-0.69               | 0.69                                                                                                   | 0.68-0.69               |
| Sex                                               | 0-15 (reference)                                  | -            | -                       | -                                                                                                      | -                       |
|                                                   | 16-24                                             | 1.56         | 1.50-1.62               | 1.59                                                                                                   | 1.52-1.65               |
|                                                   | 25-34                                             | 2.36         | 2.27-2.45               | 2.41                                                                                                   | 2.32-2.50               |
|                                                   | 35-44                                             | 4.24         | 4.10-4.38               | 4.35                                                                                                   | 4.20-4.50               |
|                                                   | 45-54                                             | 8.55         | 8.29-8.82               | 8.77                                                                                                   | 8.50-9.05               |
|                                                   | 55-64                                             | 18.76        | 18.20-19.34             | 19.24                                                                                                  | 18.66-19.85             |
|                                                   | 65+                                               | 69.65        | 67.63-71.72             | 71.38                                                                                                  | 69.27-73.55             |
| Age x both intellectual disabilities and autism   | 0-15 (reference)                                  | -            | -                       | -                                                                                                      | -                       |
|                                                   | 16-24                                             | -            | -                       | 0.63                                                                                                   | 0.51-0.79               |
|                                                   | 25-34                                             | -            | -                       | 0.74                                                                                                   | 0.57-0.95               |
|                                                   | 35-44                                             | -            | -                       | 0.39                                                                                                   | 0.30-0.52               |
|                                                   | 45-54                                             | -            | -                       | 0.29                                                                                                   | 0.22-0.38               |
|                                                   | 55-64                                             | -            | -                       | 0.22                                                                                                   | 0.16-0.29               |
|                                                   | 65+                                               | -            | -                       | 0.22                                                                                                   | 0.17-0.30               |
| Constant                                          | -                                                 | 0.01         | -                       | 0.01                                                                                                   | -                       |

Table 6: Independent predictors of physical disability in the whole population

| Characteristic                                    |                                                   | Regression 1 |                         | Regression 2 (including the interaction term: age x co-occurring intellectual disabilities and autism) |                         |
|---------------------------------------------------|---------------------------------------------------|--------------|-------------------------|--------------------------------------------------------------------------------------------------------|-------------------------|
|                                                   |                                                   | Odds ratio   | 95% confidence interval | Odds ratio                                                                                             | 95% confidence interval |
| Co-occurring intellectual disabilities and autism | Not present (reference)                           | -            | -                       | -                                                                                                      | -                       |
|                                                   | Co-occurring intellectual disabilities and autism | 61.16        | 57.60-64.94             | 157.54                                                                                                 | 144.58-171.66           |
| Gender                                            | Male (reference)                                  | -            | -                       | -                                                                                                      | -                       |
|                                                   | Female                                            | 1.06         | 1.06-1.07               | 1.06                                                                                                   | 1.06-1.07               |
| Sex                                               | 0-15 (reference)                                  | -            | -                       | -                                                                                                      | -                       |
|                                                   | 16-24                                             | 1.44         | 1.39-1.50               | 1.57                                                                                                   | 1.51-1.64               |
|                                                   | 25-34                                             | 2.60         | 2.52-2.69               | 2.86                                                                                                   | 2.76-2.96               |
|                                                   | 35-44                                             | 5.87         | 5.70-6.04               | 6.47                                                                                                   | 6.27-6.67               |
|                                                   | 45-54                                             | 10.61        | 10.31-10.91             | 11.66                                                                                                  | 11.32-12.02             |
|                                                   | 55-64                                             | 20.73        | 20.17-21.31             | 22.76                                                                                                  | 22.10-23.44             |
|                                                   | 65+                                               | 43.68        | 42.52-44.88             | 47.89                                                                                                  | 46.53-49.30             |
| Age x both intellectual disabilities and autism   | 0-15 (reference)                                  | -            | -                       | -                                                                                                      | -                       |
|                                                   | 16-24                                             | -            | -                       | 0.41                                                                                                   | 0.36-0.47               |
|                                                   | 25-34                                             | -            | -                       | 0.34                                                                                                   | 0.29-0.41               |
|                                                   | 35-44                                             | -            | -                       | 0.12                                                                                                   | 0.10-0.15               |
|                                                   | 45-54                                             | -            | -                       | 0.08                                                                                                   | 0.06-0.09               |
|                                                   | 55-64                                             | -            | -                       | 0.04                                                                                                   | 0.03-0.06               |
|                                                   | 65+                                               | -            | -                       | 0.05                                                                                                   | 0.040-0.07              |
| Constant                                          | -                                                 | 0.01         | -                       | 0.01                                                                                                   | -                       |

STROBE Statement—Checklist of items that should be included in reports of *cross-sectional studies*

|                              | Item No | Recommendation                                                                                                                                                                                    |
|------------------------------|---------|---------------------------------------------------------------------------------------------------------------------------------------------------------------------------------------------------|
| <b>Title and abstract</b>    | 1       | (a) Indicate the study's design with a commonly used term in the title or the abstract<br>Page 1 (title)                                                                                          |
|                              |         | (b) Provide in the abstract an informative and balanced summary of what was done and what was found<br>Page 2                                                                                     |
| <b>Introduction</b>          |         |                                                                                                                                                                                                   |
| Background/rationale         | 2       | Explain the scientific background and rationale for the investigation being reported<br>Pages 4-7                                                                                                 |
| Objectives                   | 3       | State specific objectives, including any pre-specified hypotheses<br>Page 7, line 9                                                                                                               |
| <b>Methods</b>               |         |                                                                                                                                                                                                   |
| Study design                 | 4       | Present key elements of study design early in the paper<br>Page 8-11                                                                                                                              |
| Setting                      | 5       | Describe the setting, locations, and relevant dates, including periods of recruitment, exposure, follow-up, and data collection<br>Page 7-8                                                       |
| Participants                 | 6       | (a) Give the eligibility criteria, and the sources and methods of selection of participants<br>Page 7-8                                                                                           |
| Variables                    | 7       | Clearly define all outcomes, exposures, predictors, potential confounders, and effect modifiers. Give diagnostic criteria, if applicable<br>Page 8-10                                             |
| Data sources/<br>measurement | 8*      | For each variable of interest, give sources of data and details of methods of assessment (measurement). Describe comparability of assessment methods if there is more than one group<br>Page 7-10 |
| Bias                         | 9       | Describe any efforts to address potential sources of bias<br>Page 9-10                                                                                                                            |
| Study size                   | 10      | Explain how the study size was arrived at<br>Page 7-8                                                                                                                                             |
| Quantitative variables       | 11      | Explain how quantitative variables were handled in the analyses. If applicable, describe which groupings were chosen and why<br>Page 10-11                                                        |
| Statistical methods          | 12      | (a) Describe all statistical methods, including those used to control for confounding<br>Page 10-11                                                                                               |
|                              |         | (b) Describe any methods used to examine subgroups and interactions<br>Page 10-11                                                                                                                 |
|                              |         | (c) Explain how missing data were addressed<br>Page 10                                                                                                                                            |
|                              |         | (d) If applicable, describe analytical methods taking account of sampling strategy<br>N/A                                                                                                         |
|                              |         | (e) Describe any sensitivity analyses<br>N/A                                                                                                                                                      |

**Results**

1  
2  
3  
4  
5  
6  
7  
8  
9  
10  
11  
12  
13  
14  
15  
16  
17  
18  
19  
20  
21  
22  
23  
24  
25  
26  
27  
28  
29  
30  
31  
32  
33  
34  
35  
36  
37  
38  
39  
40  
41  
42  
43  
44  
45  
46  
47  
48  
49  
50  
51  
52  
53  
54  
55  
56  
57  
58  
59  
60

|                          |     |                                                                                                                                                                                                                                                                                                                                                                                                                                                                   |
|--------------------------|-----|-------------------------------------------------------------------------------------------------------------------------------------------------------------------------------------------------------------------------------------------------------------------------------------------------------------------------------------------------------------------------------------------------------------------------------------------------------------------|
| Participants             | 13* | (a) Report numbers of individuals at each stage of study—eg numbers potentially eligible, examined for eligibility, confirmed eligible, included in the study, completing follow-up, and analysed<br>Page 11-12<br><hr/> (b) Give reasons for non-participation at each stage<br>N/A<br><hr/> (c) Consider use of a flow diagram<br>N/A                                                                                                                           |
| Descriptive data         | 14* | (a) Give characteristics of study participants (eg demographic, clinical, social) and information on exposures and potential confounders<br>Page 11-12, Table 1<br><hr/> (b) Indicate number of participants with missing data for each variable of interest<br>Page 10                                                                                                                                                                                           |
| Outcome data             | 15* | Report numbers of outcome events or summary measures<br>Page 13-15                                                                                                                                                                                                                                                                                                                                                                                                |
| Main results             | 16  | (a) Give unadjusted estimates and, if applicable, confounder-adjusted estimates and their precision (eg, 95% confidence interval). Make clear which confounders were adjusted for and why they were included<br>Page 12-14, Tables 3-6<br><hr/> (b) Report category boundaries when continuous variables were categorized<br>N/A<br><hr/> (c) If relevant, consider translating estimates of relative risk into absolute risk for a meaningful time period<br>N/A |
| Other analyses           | 17  | Report other analyses done—eg analyses of subgroups and interactions, and sensitivity analyses<br>Page 12-14                                                                                                                                                                                                                                                                                                                                                      |
| <b>Discussion</b>        |     |                                                                                                                                                                                                                                                                                                                                                                                                                                                                   |
| Key results              | 18  | Summarise key results with reference to study objectives<br>Page 15-17                                                                                                                                                                                                                                                                                                                                                                                            |
| Limitations              | 19  | Discuss limitations of the study, taking into account sources of potential bias or imprecision. Discuss both direction and magnitude of any potential bias<br>Page 18-20                                                                                                                                                                                                                                                                                          |
| Interpretation           | 20  | Give a cautious overall interpretation of results considering objectives, limitations, multiplicity of analyses, results from similar studies, and other relevant evidence<br>Page 15-20                                                                                                                                                                                                                                                                          |
| Generalisability         | 21  | Discuss the generalisability (external validity) of the study results<br>Page 18                                                                                                                                                                                                                                                                                                                                                                                  |
| <b>Other information</b> |     |                                                                                                                                                                                                                                                                                                                                                                                                                                                                   |
| Funding                  | 22  | Give the source of funding and the role of the funders for the present study and, if applicable, for the original study on which the present article is based<br>Page 25                                                                                                                                                                                                                                                                                          |

\*Give information separately for exposed and unexposed groups.

**Note:** An Explanation and Elaboration article discusses each checklist item and gives methodological background and published examples of transparent reporting. The STROBE checklist is best used in conjunction with this article (freely



1  
2 available on the Web sites of PLoS Medicine at <http://www.plosmedicine.org/>, Annals of Internal Medicine at  
3 <http://www.annals.org/>, and Epidemiology at <http://www.epidem.com/>). Information on the STROBE Initiative is  
4 available at [www.strobe-statement.org](http://www.strobe-statement.org).  
5  
6  
7  
8  
9  
10  
11  
12  
13  
14  
15  
16  
17  
18  
19  
20  
21  
22  
23  
24  
25  
26  
27  
28  
29  
30  
31  
32  
33  
34  
35  
36  
37  
38  
39  
40  
41  
42  
43  
44  
45  
46  
47  
48  
49  
50  
51  
52  
53  
54  
55  
56  
57  
58  
59  
60

For peer review only
